# Supplementary material
Source: publisher site journal article supplement (https://www.dovepress.com/get_supplementary_file.php?f=504392.xlsx)
Supplement: Supplementary file 1 [file get_supplementary_file.php]

## Sheet: Table S1
Table S1. Targets of the tNGS panel in this study
Category	Name
Bacteria	Staphylococcus epidermidis
Bacteria	Gemella bergeri
Bacteria	Mycobacterium bolletii
Bacteria	Mycobacterium xenopi
Bacteria	Mycobacterium mucogenicum
Bacteria	Clostridium perfringens
Bacteria	Mycobacterium smegmatis
Bacteria	Enterococcus gallinarum
Bacteria	Mycobacterium triviale
Bacteria	Listeria monocytogenes
Bacteria	Clostridium butyricum
Bacteria	Staphylococcus carnosus
Bacteria	Turicella otitidis
Bacteria	Mycobacterium szulgai
Bacteria	Streptococcus pneumoniae
Bacteria	Enterococcus faecalis
Bacteria	Staphylococcus saprophyticus
Bacteria	Mycobacterium paratuberculosis
Bacteria	Nocardia cyriacigeorgica
Bacteria	Mycobacterium gordonae
Bacteria	Mycobacterium colombiense
Bacteria	Listeria grayi
Bacteria	Lactobacillus gasseri
Bacteria	Lactococcus garvieae
Bacteria	Mycobacterium chelonae
Bacteria	Mycobacterium marinum
Bacteria	Staphylococcus lentus
Bacteria	Streptococcus mitis
Bacteria	Tropheryma whipplei
Bacteria	Staphylococcus gallinarum
Bacteria	Streptococcus cristatus
Bacteria	Clostridioides difficile
Bacteria	Mycobacterium tuberculosis complex
Bacteria	Pseudomonas putida
Bacteria	Klebsiella pneumoniae
Bacteria	Alcaligenes faecalis
Bacteria	Citrobacter freundii
Bacteria	Tannerella forsythia
Bacteria	Bordetella parapertussis
Bacteria	Acinetobacter lwoffii
Bacteria	Morganella morganii
Bacteria	Achromobacter xylosoxidans
Bacteria	Elizabethkingia meningoseptica
Bacteria	Neisseria meningitidis
Bacteria	Brucella abortus
Bacteria	Proteus vulgaris
Bacteria	Proteus mirabilis
Bacteria	Enterobacter cloacae
Bacteria	Pseudomonas fluorescens
Bacteria	Helicobacter pylori
Bacteria	Serratia marcescens
Bacteria	Campylobacter rectus
Bacteria	Brucella suis
Bacteria	Staphylococcus aureus
Bacteria	Mycolicibacterium bacteremicum
Bacteria	Mycobacterium canettii
Bacteria	Mycobacterium kansasii
Bacteria	Mycolicibacterium thermoresistibile
Bacteria	Granulicatella elegans
Bacteria	Bacillus subtilis
Bacteria	Mycobacterium ulcerans
Bacteria	Bacillus cereus
Bacteria	Staphylococcus lugdunensis
Bacteria	Mycobacterium scrofulaceum
Bacteria	Mycobacterium leprae
Bacteria	Rhodococcus hoagii
Bacteria	Mycobacterium marseillense
Bacteria	Mycobacterium massiliense
Bacteria	Mycobacterium malmoense
Bacteria	Mycolicibacterium mageritense
Bacteria	Mycobacterium lentiflavum
Bacteria	Streptococcus milleri
Bacteria	Mycobacteroides immunogenum
Bacteria	Mycolicibacterium vaccae
Bacteria	Enterococcus durans
Bacteria	Trueperella pyogenes
Bacteria	Streptococcus pyogenes
Bacteria	Mycobacterium avium complex
Bacteria	Mycobacterium avium
Bacteria	Mycobacterium bovis
Bacteria	Streptococcus bovis
Bacteria	Mycobacteroides abscessus
Bacteria	Nocardia abscessus
Bacteria	Mycobacterium fortuitum
Bacteria	Nocardia farcinica
Bacteria	clostridium tetani
Bacteria	Haemophilus parainfluenzae
Bacteria	Salmonella Paratyphi
Bacteria	Bartonella henselae
Bacteria	Proteus hauseri
Bacteria	Elizabethkingia miricola
Bacteria	Vibrio cholerae
Bacteria	Brucella canis
Bacteria	Cardiobacterium hominis
Bacteria	Neisseria lactamica
Bacteria	Salmonella Typhi
Bacteria	Pseudescherichia vulneris
Bacteria	Legionella pneumophila
Bacteria	Stenotrophomonas maltophilia
Bacteria	Aeromonas hydrophila
Bacteria	Coxiella burnetii
Bacteria	Borreliella burgdorferi
Bacteria	Chlamydia pneumoniae
Bacteria	Mycoplasma pneumoniae
Bacteria	Borrelia recurrentis
Bacteria	Ureaplasma urealyticum
Bacteria	Enterococcus casseliflavus
Bacteria	Abiotrophia defectiva
Bacteria	Mycobacterium tuberculosis
Bacteria	Staphylococcus hominis
Bacteria	Mycobacterium genavense
Bacteria	Staphylococcus haemolyticus
Bacteria	Clostridium botulinum
Bacteria	Nocardia carnea
Bacteria	Leuconostoc lactis
Bacteria	Mycobacterium triplex
Bacteria	Mycobacterium shimoidei
Bacteria	Staphylococcus schleiferi
Bacteria	Enterococcus faecium
Bacteria	Mycobacterium haemophilum
Bacteria	Bacillus anthracis
Bacteria	Micrococcus luteus
Bacteria	Mycobacterium microti
Bacteria	Nocardia terpenica
Bacteria	Streptococcus dysgalactiae
Bacteria	Staphylococcus capitis
Bacteria	Mycolicibacter terrae
Bacteria	Nocardia otitidiscaviarum
Bacteria	Mycolicibacterium peregrinum
Bacteria	Corynebacterium striatum
Bacteria	Staphylococcus warneri
Bacteria	Streptococcus agalactiae
Bacteria	Veillonella parvula
Bacteria	Mycolicibacterium neoaurum
Bacteria	Nocardia niigatensis
Bacteria	Nocardia asteroides
Bacteria	Streptococcus constellatus
Bacteria	Mycobacterium kumamotonense
Bacteria	Nocardia asiatica
Bacteria	Bordetella holmesii
Bacteria	Enterobacter hormaechei
Bacteria	Corynebacterium minutissimum
Bacteria	Yersinia pseudotuberculosis
Bacteria	Corynebacterium jeikeium
Bacteria	Kingella kingae
Bacteria	Yersinia pestis
Bacteria	Campylobacter fetus
Bacteria	Burkholderia gladioli
Bacteria	Pseudomonas aeruginosa
Bacteria	Aeromonas caviae
Bacteria	Campylobacter sputorum
Bacteria	Parvimonas micra
Bacteria	Bartonella vinsonii
Bacteria	Rickettsia felis
Bacteria	Treponema paraluiscuniculi
Bacteria	Mycoplasma hominis
Bacteria	Chlamydia trachomatis
Bacteria	Mycoplasma genitalium
Bacteria	Anaplasma phagocytophilum
Bacteria	Peptostreptococcus anaerobius
Bacteria	Streptococcus anginosus
Bacteria	Actinomyces israelii
Bacteria	Gardnerella vaginalis
Bacteria	Mycobacterium celatum
Bacteria	Streptococcus infantarius
Bacteria	Mycobacterium simiae
Bacteria	Lactobacillus jensenii
Bacteria	Streptococcus intermedius
Bacteria	Staphylococcus intermedius
Bacteria	Erysipelothrix rhusiopathiae
Bacteria	Streptococcus suis
Bacteria	Elizabethkingia anophelis
Bacteria	Moraxella osloensis
Bacteria	Bordetella pertussis
Bacteria	Cronobacter sakazakii
Bacteria	Aggregatibacter actinomycetemcomitans
Bacteria	Acinetobacter baumannii
Bacteria	Burkholderia mallei
Bacteria	Porphyromonas asaccharolytica
Bacteria	Citrobacter braakii
Bacteria	Prevotella melaninogenica
Bacteria	Pseudomonas alcaligenes
Bacteria	Klebsiella aerogenes
Bacteria	Klebsiella oxytoca
Bacteria	Chryseobacterium indologenes
Bacteria	Pantoea agglomerans
Bacteria	Vibrio Vulnificus
Bacteria	Bacteroides fragilis
Bacteria	Escherichia coli
Bacteria	Campylobacter coli
Bacteria	Pasteurella multocida
Bacteria	Burkholderia multivorans
Bacteria	Moraxella catarrhalis
Bacteria	Citrobacter koseri
Bacteria	Campylobacter jejuni
Bacteria	Providencia rettgeri
Bacteria	Burkholderia pseudomallei
Bacteria	Neisseria gonorrhoeae
Bacteria	Haemophilus influenzae
Bacteria	Yersinia enterocolitica
Bacteria	Porphyromonas gingivalis
Bacteria	Brucella melitensis
Bacteria	Burkholderia cepacia
Bacteria	Serratia liquefaciens
Bacteria	Acinetobacter nosocomialis
Bacteria	Acinetobacter calcoaceticus
Bacteria	Neorickettsia sennetsu
Bacteria	Orientia tsutsugamushi
Bacteria	Chlamydia psittaci
Bacteria	Rickettsia typhi
Bacteria	Rickettsia rickettsii
Bacteria	Leptospira interrogans
Fungi	Trichosporon asahii
Fungi	Paracoccidioides brasiliensis
Fungi	Geotrichum candidum
Fungi	Candida albicans
Fungi	Cladophialophora bantiana
Fungi	Aspergillus clavatus
Fungi	Coccidioides posadasii
Fungi	Fusarium proliferatum
Fungi	Fusarium verticillioides
Fungi	Coccidioides immitis
Fungi	Rhizopus delemar
Fungi	Candida dubliniensis
Fungi	Lomentospora prolificans
Fungi	Candida auris
Fungi	Cryptococcus gattii
Fungi	Aspergillus nidulans
Fungi	Cladosporium cladosporioides
Fungi	Candida glabrata
Fungi	Debaryomyces hansenii
Fungi	Fusarium graminearum
Fungi	Aspergillus niger
Fungi	Trichophyton rubrum
Fungi	Aspergillus flavus
Fungi	Penicillium griseofulvum
Fungi	Cunninghamella bertholletiae
Fungi	Meyerozyma guilliermondii
Fungi	Histoplasma capsulatum
Fungi	Fusarium oxysporum
Fungi	Scedosporium apiospermum
Fungi	Fusarium subglutinans
Fungi	Wickerhamomyces anomalus
Fungi	Candida parapsilosis
Fungi	Penicillium citrinum
Fungi	Mucor racemosus
Fungi	Mucor circinelloides
Fungi	Cladophialophora carrionii
Fungi	Malassezia furfur
Fungi	Pichia kudriavzevii
Fungi	Schizophyllum commune
Fungi	Clavispora lusitaniae
Fungi	Papiliotrema laurentii
Fungi	Talaromyces marneffei
Fungi	Rhizopus oryzae
Fungi	Aspergillus oryzae
Fungi	Rhizomucor endophyticus
Fungi	Saccharomyces cerevisiae
Fungi	Fonsecaea pedrosoi
Fungi	Exophiala dermatitidis
Fungi	Blastomyces dermatitidis
Fungi	Candida tropicalis
Fungi	Lichtheimia corymbifera
Fungi	Rhizopus oligosporus
Fungi	Sporothrix schenckii
Fungi	Fusarium fujikuroi
Fungi	Magnusiomyces capitatus
Fungi	Aspergillus terreus
Fungi	Rhizomucor pusillus
Fungi	Rhizomucor irregularis
Fungi	Candida haemulonis
Fungi	Rhizopus microsporus
Fungi	Cryptococcus neoformans
Fungi	Aspergillus fumigatus
Fungi	Pneumocystis jirovecii
Fungi	Trichosporon jirovecii
Fungi	Trichophyton verrucosum
Fungi	Aspergillus versicolor
DNA-virus	BK Polyomavirus
DNA-virus	Epstein-Barr virus
DNA-virus	JC polyomavirus
DNA-virus	Human polyomavirus 3
DNA-virus	MW polyomavirus
DNA-virus	TTV-like mini virus
DNA-virus	Hepatitis B virus
DNA-virus	WU Polyomavirus
DNA-virus	Molluscum contagiosum virus
DNA-virus	Monkeypox virus
DNA-virus	Cytomegalo virus
DNA-virus	Orf virus
DNA-virus	Human bocavirus
DNA-virus	Merkel cell polyomavirus
DNA-virus	Human polyomavirus 7
DNA-virus	Herpes simplex virus 1
DNA-virus	Human herpesvirus 2
DNA-virus	human herpesvirus 6B
DNA-virus	Human herpesvirus 7
DNA-virus	Human herpesvirus 8
DNA-virus	Human parvovirus B19
DNA-virus	Human herpesvirus 3
DNA-virus	Torque teno virus
DNA-virus	Adenovirus
DNA-virus	Adeno-associated virus
RNA-virus	Echovirus
RNA-virus	Rhinovirus A
RNA-virus	Rhinovirus B
RNA-virus	Rhinovirus C
RNA-virus	Influenza C virus
RNA-virus	Powassan virus
RNA-virus	Enterovirus A
RNA-virus	Enterovirus B
RNA-virus	Enterovirus C
RNA-virus	Enterovirus D
RNA-virus	Dengue virus 1
RNA-virus	Dengue virus 2
RNA-virus	Dengue virus 3
RNA-virus	Dengue virus 4
RNA-virus	Eastern equine encephalitis virus
RNA-virus	Rubella virus
RNA-virus	Zika virus
RNA-virus	Parechovirus
RNA-virus	Human parainfluenza virus 1
RNA-virus	Human orthorubulavirus 2
RNA-virus	Human parainfluenza virus 3
RNA-virus	Human parainfluenza virus 4
RNA-virus	Hantavirus Z10
RNA-virus	Nipah henipavirus
RNA-virus	Human respiratory syncytial virus A
RNA-virus	Human respiratory syncytial virus B
RNA-virus	Yellow fever virus
RNA-virus	poliovirus 1
RNA-virus	poliovirus 2
RNA-virus	poliovirus 3
RNA-virus	Influenza A virus
RNA-virus	coxsackievirus A
RNA-virus	Coxsackievirus A16
RNA-virus	Middle East respiratory syndrome-related coronavirus
RNA-virus	Coxsackievirus A21
RNA-virus	coxsackievirus A6
RNA-virus	coxsackievirus B
RNA-virus	Rabies lyssavirus
RNA-virus	La Crosse virus
RNA-virus	Lymphocytic choriomeningitis mammarenavirus
RNA-virus	Orthohepevirus A
RNA-virus	Japanese encephalitis virus
RNA-virus	Rotavirus
RNA-virus	Measles virus
RNA-virus	Murray Valley encephalitis virus
RNA-virus	Encephalomyocarditis virus
RNA-virus	Primate norovirus
RNA-virus	Tick-borne encephalitis virus
RNA-virus	Human coronavirus 229E
RNA-virus	Human coronavirus HKU1
RNA-virus	Human coronavirus NL63
RNA-virus	Human coronavirus OC43
RNA-virus	Human immunodeficiency virus 1
RNA-virus	Primate T-lymphotropic virus 2
RNA-virus	Primate T-lymphotropic virus 1
RNA-virus	Human Astrovirus
RNA-virus	Human metapneumovirus
RNA-virus	Mumps rubulavirus
RNA-virus	Saint Louis encephalitis virus
RNA-virus	Toscana virus
RNA-virus	West Nile virus
RNA-virus	SFTS virus
RNA-virus	Severe acute respiratory syndrome coronavirus 2
RNA-virus	Severe acute respiratory syndrome coronavirus
RNA-virus	Influenza B
RNA-virus	Sapovirus
Parasite	Ancylostoma braziliense
Parasite	Trypanosoma brucei
Parasite	Fasciolopsis buski
Parasite	Giardia intestinalis
Parasite	Plasmodium falciparum
Parasite	Fasciola hepatica
Parasite	Toxoplasma gondii
Parasite	Toxoplasma
Parasite	Angiostrongylus cantonensis
Parasite	Opisthorchis viverrini
Parasite	Clonorchis sinensis
Parasite	Plasmodium vivax
Parasite	Thelazia callipaeda
Parasite	Trypanosoma cruzi
Parasite	Plasmodium ovale
Parasite	Dracunculus medinensis
Parasite	Schistosoma mansoni
Parasite	Toxocara cati
Parasite	Necator americanus
Parasite	Taenia saginata
Parasite	Plasmodium
Parasite	Toxocara canis
Parasite	Trypanosoma rangeli
Parasite	Leishmania Tropica
Parasite	Cryptosporidium hominis
Parasite	Schistosoma japonicum
Parasite	Entamoeba histolytica
Parasite	Enterobius vermicularis
Parasite	Ascaris lumbricoides
Parasite	Encephalitozoon cuniculi
Parasite	Paragonimus westermani
Parasite	Anisakis
Parasite	Trichomonas vaginalis
Parasite	Taenia solium
Parasite	Leucocytozoon
Other pathogens	Borrelia burgdorferi
Other pathogens	Borrelia recurrentis
Other pathogens	Treponema pallidum
Other pathogens	Leptospira interrogans
Other pathogens	Rickettsia typhi
Other pathogens	Coxiella burnetii
Other pathogens	Mycoplasma pneumoniae
Other pathogens	Mycoplasma hominis
Other pathogens	Mycoplasma genitalium
Other pathogens	Ureaplasma urealyticum
Other pathogens	Rickettsia rickettsii
Other pathogens	Feline Rickettsia
Other pathogens	Chlamydia pneumoniae
Other pathogens	Chlamydia trachomatis
Other pathogens	Orientia tsutsugamushi
Other pathogens	Chlamydia psittaci
Antimicrobial resistance genes	AAC(2')
Antimicrobial resistance genes	AAC(3)
Antimicrobial resistance genes	AAC(6')
Antimicrobial resistance genes	ANT
Antimicrobial resistance genes	APH
Antimicrobial resistance genes	ARM
Antimicrobial resistance genes	RMT
Antimicrobial resistance genes	aadA
Antimicrobial resistance genes	ereA
Antimicrobial resistance genes	ereB
Antimicrobial resistance genes	ermB
Antimicrobial resistance genes	mefA
Antimicrobial resistance genes	mefE
Antimicrobial resistance genes	msrA
Antimicrobial resistance genes	macA
Antimicrobial resistance genes	macB
Antimicrobial resistance genes	mphB
Antimicrobial resistance genes	vanA
Antimicrobial resistance genes	vanB
Antimicrobial resistance genes	vanC
Antimicrobial resistance genes	vanD
Antimicrobial resistance genes	vanE
Antimicrobial resistance genes	vanG
Antimicrobial resistance genes	DFR
Antimicrobial resistance genes	SUL
Antimicrobial resistance genes	mecA
Antimicrobial resistance genes	mecB
Antimicrobial resistance genes	mecC
Antimicrobial resistance genes	QAC
Antimicrobial resistance genes	qnrA
Antimicrobial resistance genes	EMR
Antimicrobial resistance genes	CAT
Antimicrobial resistance genes	cmlA
Antimicrobial resistance genes	floR
Antimicrobial resistance genes	CcrA
Antimicrobial resistance genes	FEZ-1
Antimicrobial resistance genes	GOB-1
Antimicrobial resistance genes	IND
Antimicrobial resistance genes	KPC
Antimicrobial resistance genes	NMC
Antimicrobial resistance genes	OXA-181
Antimicrobial resistance genes	OXA-198
Antimicrobial resistance genes	OXA-23
Antimicrobial resistance genes	OXA-24
Antimicrobial resistance genes	OXA-48
Antimicrobial resistance genes	OXA-69
Antimicrobial resistance genes	OXA-51
Antimicrobial resistance genes	OXA-55
Antimicrobial resistance genes	SFH-1
Antimicrobial resistance genes	SPM-1
Antimicrobial resistance genes	VIM
Antimicrobial resistance genes	CTX-M-1
Antimicrobial resistance genes	CTX-M-2
Antimicrobial resistance genes	CTX-M-25
Antimicrobial resistance genes	GES
Antimicrobial resistance genes	OXA-1
Antimicrobial resistance genes	OXA-2
Antimicrobial resistance genes	OXA-7
Antimicrobial resistance genes	OXA-9
Antimicrobial resistance genes	OXA-10
Antimicrobial resistance genes	PER
Antimicrobial resistance genes	ROB-1
Antimicrobial resistance genes	SHV
Antimicrobial resistance genes	TEM
Antimicrobial resistance genes	VEB
Antimicrobial resistance genes	ACC
Antimicrobial resistance genes	ACT
Antimicrobial resistance genes	ADC
Antimicrobial resistance genes	AmpC
Antimicrobial resistance genes	CMY
Antimicrobial resistance genes	DHA
Antimicrobial resistance genes	MIR
Antimicrobial resistance genes	GIM
Antimicrobial resistance genes	IMP
Antimicrobial resistance genes	NDM
Antimicrobial resistance genes	SIM
Antimicrobial resistance genes	tetA
Antimicrobial resistance genes	tetB
Antimicrobial resistance genes	tetC
Antimicrobial resistance genes	tetD
Antimicrobial resistance genes	tetE
Antimicrobial resistance genes	tetK
Antimicrobial resistance genes	tetL
Antimicrobial resistance genes	tetM
Antimicrobial resistance genes	tetO
Antimicrobial resistance genes	tetQ
Antimicrobial resistance genes	tetS
Antimicrobial resistance genes	tetT
Antimicrobial resistance genes	tetW
Antimicrobial resistance genes	ACR
Antimicrobial resistance genes	ADE
Antimicrobial resistance genes	tolC
Antimicrobial resistance genes	mcr-1
Virulence genes for Escherichia coli	chuA
Virulence genes for Escherichia coli	chuS
Virulence genes for Escherichia coli	chuT
Virulence genes for Escherichia coli	chuU
Virulence genes for Escherichia coli	chuW
Virulence genes for Escherichia coli	chuY
Virulence genes for Escherichia coli	hlyA
Virulence genes for Escherichia coli	hlyB
Virulence genes for Escherichia coli	hlyC
Virulence genes for Escherichia coli	hlyD
Virulence genes for Escherichia coli	stx1A
Virulence genes for Escherichia coli	stx1B
Virulence genes for Escherichia coli	stx2A
Virulence genes for Escherichia coli	stx2B
Virulence genes for Escherichia coli	gtrA
Virulence genes for Escherichia coli	gtrB
Virulence genes for Escherichia coli	gtrII
Virulence genes for Escherichia coli	set1A
Virulence genes for Escherichia coli	set1B
Virulence genes for Escherichia coli	stxA
Virulence genes for Escherichia coli	stxB
Virulence genes for Escherichia coli	cdtA
Virulence genes for Escherichia coli	cdtB
Virulence genes for Escherichia coli	cdtC
Virulence genes for Escherichia coli	ibeA
Virulence genes for Escherichia coli	ibeB
Virulence genes for Escherichia coli	ibeC
Virulence genes for Escherichia coli	kpsD
Virulence genes for Escherichia coli	kpsM
Virulence genes for Escherichia coli	kpsT
Virulence genes for Escherichia coli	hlyA
Virulence genes for Escherichia coli	hlyB
Virulence genes for Escherichia coli	hlyC
Virulence genes for Escherichia coli	hlyD
Virulence genes for Escherichia coli	astA
Virulence genes for Escherichia coli	pet
Virulence genes for Escherichia coli	pic
Virulence genes for Escherichia coli	set1A
Virulence genes for Escherichia coli	set1B
Virulence genes for Escherichia coli	senB
Virulence genes for Escherichia coli	east1
Virulence genes for Escherichia coli	eltA
Virulence genes for Escherichia coli	eltB
Virulence genes for Escherichia coli	estIa
Virulence genes for Escherichia coli	aslA
Virulence genes for Escherichia coli	ompA
Virulence genes for Escherichia coli	traJ
Virulence genes for Escherichia coli	cnf1
Virulence genes for Pseudomonas aeruginosa	fleN
Virulence genes for Pseudomonas aeruginosa	fleQ
Virulence genes for Pseudomonas aeruginosa	fleR
Virulence genes for Pseudomonas aeruginosa	flgC
Virulence genes for Pseudomonas aeruginosa	flgD
Virulence genes for Pseudomonas aeruginosa	flgE
Virulence genes for Pseudomonas aeruginosa	flgF
Virulence genes for Pseudomonas aeruginosa	flgG
Virulence genes for Pseudomonas aeruginosa	flgH
Virulence genes for Pseudomonas aeruginosa	flgI
Virulence genes for Pseudomonas aeruginosa	flgJ
Virulence genes for Pseudomonas aeruginosa	flgK
Virulence genes for Pseudomonas aeruginosa	flgL
Virulence genes for Pseudomonas aeruginosa	flhA
Virulence genes for Pseudomonas aeruginosa	flhB
Virulence genes for Pseudomonas aeruginosa	flhF
Virulence genes for Pseudomonas aeruginosa	fliC
Virulence genes for Pseudomonas aeruginosa	fliD
Virulence genes for Pseudomonas aeruginosa	fliE
Virulence genes for Pseudomonas aeruginosa	fliF
Virulence genes for Pseudomonas aeruginosa	fliG
Virulence genes for Pseudomonas aeruginosa	fliH
Virulence genes for Pseudomonas aeruginosa	fliI
Virulence genes for Pseudomonas aeruginosa	fliJ
Virulence genes for Pseudomonas aeruginosa	fliM
Virulence genes for Pseudomonas aeruginosa	fliN
Virulence genes for Pseudomonas aeruginosa	fliO
Virulence genes for Pseudomonas aeruginosa	fliP
Virulence genes for Pseudomonas aeruginosa	fliQ
Virulence genes for Pseudomonas aeruginosa	fliR
Virulence genes for Pseudomonas aeruginosa	waaA
Virulence genes for Pseudomonas aeruginosa	waaC
Virulence genes for Pseudomonas aeruginosa	waaF
Virulence genes for Pseudomonas aeruginosa	waaG
Virulence genes for Pseudomonas aeruginosa	waaP
Virulence genes for Pseudomonas aeruginosa	wzy
Virulence genes for Pseudomonas aeruginosa	wzz
Virulence genes for Pseudomonas aeruginosa	alg44
Virulence genes for Pseudomonas aeruginosa	alg8
Virulence genes for Pseudomonas aeruginosa	algA
Virulence genes for Pseudomonas aeruginosa	algB
Virulence genes for Pseudomonas aeruginosa	algD
Virulence genes for Pseudomonas aeruginosa	algE
Virulence genes for Pseudomonas aeruginosa	algF
Virulence genes for Pseudomonas aeruginosa	algG
Virulence genes for Pseudomonas aeruginosa	algI
Virulence genes for Pseudomonas aeruginosa	algJ
Virulence genes for Pseudomonas aeruginosa	algK
Virulence genes for Pseudomonas aeruginosa	algL
Virulence genes for Pseudomonas aeruginosa	algP
Virulence genes for Pseudomonas aeruginosa	algQ
Virulence genes for Pseudomonas aeruginosa	algR
Virulence genes for Pseudomonas aeruginosa	algU
Virulence genes for Pseudomonas aeruginosa	algX
Virulence genes for Pseudomonas aeruginosa	algZ
Virulence genes for Pseudomonas aeruginosa	mucA
Virulence genes for Pseudomonas aeruginosa	mucB
Virulence genes for Pseudomonas aeruginosa	mucC
Virulence genes for Pseudomonas aeruginosa	toxA
Virulence genes for Pseudomonas aeruginosa	exoS
Virulence genes for Pseudomonas aeruginosa	exoT
Virulence genes for Pseudomonas aeruginosa	exoU
Virulence genes for Pseudomonas aeruginosa	exoY
Virulence genes for Pseudomonas aeruginosa	plcH
Virulence genes for Acinetobacter baumannii	adeF
Virulence genes for Acinetobacter baumannii	adeG
Virulence genes for Acinetobacter baumannii	adeH
Virulence genes for Acinetobacter baumannii	bap
Virulence genes for Acinetobacter baumannii	csuA
Virulence genes for Acinetobacter baumannii	csuB
Virulence genes for Acinetobacter baumannii	csuC
Virulence genes for Acinetobacter baumannii	csuD
Virulence genes for Acinetobacter baumannii	csuE
Virulence genes for Acinetobacter baumannii	pgaA
Virulence genes for Acinetobacter baumannii	pgaB
Virulence genes for Acinetobacter baumannii	pgaC
Virulence genes for Acinetobacter baumannii	pgaD
Virulence genes for Acinetobacter baumannii	lpsB
Virulence genes for Acinetobacter baumannii	lpxA
Virulence genes for Acinetobacter baumannii	lpxB
Virulence genes for Acinetobacter baumannii	lpxC
Virulence genes for Acinetobacter baumannii	lpxD
Virulence genes for Acinetobacter baumannii	lpxL
Virulence genes for Acinetobacter baumannii	lpxM
Virulence genes for Klebsiella pneumoniae	iucA
Virulence genes for Klebsiella pneumoniae	iucB
Virulence genes for Klebsiella pneumoniae	iucC
Virulence genes for Klebsiella pneumoniae	iucD
Virulence genes for Klebsiella pneumoniae	iutA
Virulence genes for Klebsiella pneumoniae	entA
Virulence genes for Klebsiella pneumoniae	entB
Virulence genes for Klebsiella pneumoniae	entC
Virulence genes for Klebsiella pneumoniae	entD
Virulence genes for Klebsiella pneumoniae	entE
Virulence genes for Klebsiella pneumoniae	entF
Virulence genes for Klebsiella pneumoniae	fepA
Virulence genes for Klebsiella pneumoniae	fepB
Virulence genes for Klebsiella pneumoniae	fepC
Virulence genes for Klebsiella pneumoniae	fepD
Virulence genes for Klebsiella pneumoniae	fepG
Virulence genes for Klebsiella pneumoniae	fes
Virulence genes for Klebsiella pneumoniae	ybdA
Virulence genes for Klebsiella pneumoniae	iroB
Virulence genes for Klebsiella pneumoniae	iroC
Virulence genes for Klebsiella pneumoniae	iroD
Virulence genes for Klebsiella pneumoniae	iroE
Virulence genes for Klebsiella pneumoniae	iroN
Virulence genes for Klebsiella pneumoniae	fyuA
Virulence genes for Klebsiella pneumoniae	irp1
Virulence genes for Klebsiella pneumoniae	irp2
Virulence genes for Klebsiella pneumoniae	ybtA
Virulence genes for Klebsiella pneumoniae	ybtE
Virulence genes for Klebsiella pneumoniae	ybtP
Virulence genes for Klebsiella pneumoniae	ybtQ
Virulence genes for Klebsiella pneumoniae	ybtS
Virulence genes for Klebsiella pneumoniae	ybtT
Virulence genes for Klebsiella pneumoniae	ybtU
Virulence genes for Klebsiella pneumoniae	ybtX
Virulence genes for Klebsiella pneumoniae	allA
Virulence genes for Klebsiella pneumoniae	allB
Virulence genes for Klebsiella pneumoniae	allC
Virulence genes for Klebsiella pneumoniae	allD
Virulence genes for Klebsiella pneumoniae	allR
Virulence genes for Klebsiella pneumoniae	allS
Virulence genes for Klebsiella pneumoniae	clbA
Virulence genes for Klebsiella pneumoniae	clbB
Virulence genes for Klebsiella pneumoniae	clbC
Virulence genes for Klebsiella pneumoniae	clbD
Virulence genes for Klebsiella pneumoniae	clbE
Virulence genes for Klebsiella pneumoniae	clbF
Virulence genes for Klebsiella pneumoniae	clbG
Virulence genes for Klebsiella pneumoniae	clbH
Virulence genes for Klebsiella pneumoniae	clbI
Virulence genes for Klebsiella pneumoniae	clbJ
Virulence genes for Klebsiella pneumoniae	clbK
Virulence genes for Klebsiella pneumoniae	clbL
Virulence genes for Klebsiella pneumoniae	clbM
Virulence genes for Klebsiella pneumoniae	clbN
Virulence genes for Klebsiella pneumoniae	clbO
Virulence genes for Klebsiella pneumoniae	clbP
Virulence genes for Klebsiella pneumoniae	clbQ
Virulence genes for Klebsiella pneumoniae	clbS

## Sheet: Table S2
Table S2. Details of pathegons detected by tNGS, mNGS, and CMTs
Patients' identity	Patients' department	Sample types	Pathogen types	Pathogen names	Short name of pathogens	tNGS-pathogens	mNGS-pathogens	CMT-pathogens	Pathogen adjudication	Responsible pathegons according to composit clinical standards	tNGS-diagnostic performance	mNGS-diagnostic performance	CMT-diagnostic performance	Clinical diagnosis	tNGS-reads	tNGS-normalized reads(/mL)	mNGS-detection method	mNGS-copy number	mNGS-relative abundance	Bacterial culture	Mycobacterial culture	Fungal culture	SARS-CoV-2 RT-qPCR	Multiplex PCR for 15 viruses	CMV DNA（IU/mL, normal range＜250)	G Test（pg/mL, normal range＜100）	GM test（μg/L, normal range＜0.5）	T-SPOT:A antigen（normal range＜6）	T-SPOT:B antigen（normal range＜6）	Xpert MTB/RIF	Comment
1	ICU	BALF	Bacteria	Pseudomonas aeruginosa	P.aeruginosa	+	+	+	Definite	Yes	TP	TP	TP	Pneumonia	128841	2111200	DNA＋RNA	56567	0.98	P.aeruginosa	/	Negative	Negative	Negative	＜250	225.56	Negative	0	0	/	Use of Ceftazidime
1	ICU	BALF	DNA virus	Herpes simplex virus 1	HSV-1	-	+	-	Not evaluated	Non-pathogenic	/	/	/	Pneumonia	-	-	DNA＋RNA	50	0.15	P.aeruginosa	/	Negative	Negative	Negative	＜250	226.56	Negative	0	0	/	/
2	ICU	BALF	Bacteria	Pseudomonas aeruginosa	P.aeruginosa	+	+	+	Definite	Yes	TP	TP	TP	Pneumonia	102755	4613280	DNA＋RNA	2437248	0.758	P.aeruginosa	Negative	Negative	Negative	Negative	/	Negative	Negative	1	11	Negative	/
2	ICU	BALF	Bacteria	Burkholderia cenocepacia	B.cenocepacia	Out of detection range	+	-	Probable	Yes	FN	TP	FN	Pneumonia	-	-	DNA＋RNA	277482	0.154	P.aeruginosa	Negative	Negative	Negative	Negative	/	Negative	Negative	1	11	Negative	/
2	ICU	BALF	Bacteria	Burkholderia multivorans	B.multivorans	+	+	-	Definite	No	/	/	/	Pneumonia	610	2736	DNA＋RNA	50907	0.027	P.aeruginosa	Negative	Negative	Negative	Negative	/	Negative	Negative	1	11	Negative	/
2	ICU	BALF	DNA virus	Cytomegalo virus	CMV	+	+	-	Not evaluated	Non-pathogenic	/	/	/	Pneumonia	3038	13648	DNA＋RNA	7	0.62	P.aeruginosa	Negative	Negative	Negative	Negative	/	Negative	Negative	1	11	Negative	/
3	ICU	Sputum	Bacteria	Pseudomonas aeruginosa	P.aeruginosa	+	+	+	Definite	Yes	TP	TP	TP	Pneumonia	19311	494720	DNA	35828	0.074	P.aeruginosa	/	Negative	Negative	/	＜250	/	/	/	/	/	/
3	ICU	Sputum	Bacteria	Stenotrophomonas maltophilia	S.maltophilia	+	+	+	Definite	Yes	TP	TP	TP	Pneumonia	19301	494400	DNA	21261	0.056	A.baumannii, S.maltophilia	/	Negative	Negative	/	＜250	/	/	/	/	/	/
3	ICU	Sputum	Bacteria	Staphylococcus aureus	S.aureus	+	+	-	Definite	Yes	TP	TP	FN	Pneumonia	12898	330400	DNA	10124	0.055	A.baumannii, S.maltophilia	/	Negative	Negative	/	＜250	/	/	/	/	/	/
3	ICU	Sputum	Bacteria	Acinetobacter baumannii	A.baumannii	+	+	+	Definite	Yes	TP	TP	TP	Pneumonia	64028	1640000	DNA	12642	0.075	A.baumannii, S.maltophilia	/	Negative	Negative	/	＜250	/	/	/	/	/	/
3	ICU	Sputum	Fungi	Candida albicans	C.albicans	+	+	-	Not evaluated	Colonization	/	/	/	Pneumonia	12850	329120	DNA	318	0.754	A.baumannii, S.maltophilia	/	Negative	Negative	/	＜250	/	/	/	/	/	/
3	ICU	Sputum	Fungi	Candida glabrata	C.glabrata	+	+	-	Not evaluated	Colonization	/	/	/	Pneumonia	496	1280	DNA	32	0.082	A.baumannii, S.maltophilia	/	Negative	Negative	/	＜250	/	/	/	/	/	/
3	ICU	Sputum	Fungi	Candida parapsilosis	C.parapsilosis	+	-	-	Not evaluated	Colonization	/	/	/	Pneumonia	11	32	DNA	-	-	A.baumannii, S.maltophilia	/	Negative	Negative	/	＜250	/	/	/	/	/	/
3	ICU	Sputum	DNA virus	Herpes simplex virus 1	HSV-1	+	+	-	Not evaluated	Non-pathogenic	/	/	/	Pneumonia	859	2208	DNA	27	0.078	A.baumannii, S.maltophilia	/	Negative	Negative	/	＜250	/	/	/	/	/	/
3	ICU	Sputum	DNA virus	Epstein-Barr virus	EBV	+	+	-	Not evaluated	Non-pathogenic	/	/	/	Pneumonia	17159	439520	DNA	40	0.102	A.baumannii, S.maltophilia	/	Negative	Negative	/	＜250	/	/	/	/	/	/
4	No-ICU	BALF	Fungi	Cryptococcus neoformans	C.neoformans	+	+	-	Definite	Yes	TP	TP	FN	Pneumonia	10	16	DNA＋RNA	2632	0.901	Negative	Negative	Negative	/	/	/	/	/	/	/	Negative	/
5	ICU	BALF	RNA virus	Influenza A virus	IAV	+	+	+	Definite	Yes	TP	TP	TP	Pneumonia	270009	8103680	DNA＋RNA	6101	0.96	Negative	Negative	Negative	Negative	IAV	＜250	Negative	Negative	0	0	Negative	/
5	ICU	BALF	DNA virus	Epstein-Barr virus	EBV	+	+	-	Not evaluated	Non-pathogenic	/	/	/	Pneumonia	1404	42240	DNA＋RNA	96	0.977	Negative	Negative	Negative	Negative	IAV	＜250	Negative	Negative	0	0	Negative	/
6	No-ICU	BALF	Fungi	Aspergillus fumigatus	A.fumigatus	-	+	-	Probable	Yes	FN	TP	FN	Pneumonia	-	-	DNA＋RNA	372	0.598	Negative	Negative	Negative	Negative	/	/	Negative	Negative	0	0	Negative	/
7	ICU	Sputum	Bacteria	Acinetobacter baumannii	A.baumannii	+	+	+	Definite	Yes	TP	TP	TP	Pneumonia	91459	4826416	DNA＋RNA	9032	0.771	A.baumannii	Negative	Negative	Negative	Negative	＜250	Negative	Negative	/	/	/	/
7	ICU	Sputum	DNA virus	Herpes simplex virus 1	HSV-1	+	+	-	Not evaluated	Non-pathogenic	/	/	/	Pneumonia	59661	3148384	DNA＋RNA	386	0.018	A.baumannii	Negative	Negative	Negative	Negative	＜250	Negative	Negative	/	/	/	/
8	ICU	BALF	Bacteria	Acinetobacter baumannii	A.baumannii	+	+	+	Definite	Yes	TP	TP	TP	Pneumonia	110614	9483888	DNA	2726	0.53	A.baumannii	/	Negative	Negative	Negative	/	Negative	Negative	/	/	/	/
8	ICU	BALF	Fungi	Candida albicans	C.albicans	+	-	-	Not evaluated	Colonization	/	/	/	Pneumonia	382	3268	DNA	-	-	A.baumannii	/	Negative	Negative	Negative	/	Negative	Negative	/	/	/	/
8	ICU	BALF	Fungi	Candida glabrata	C.glabrata	-	+	-	Not evaluated	Colonization	/	/	/	Pneumonia	-	-	DNA	4	0.029	A.baumannii	/	Negative	Negative	Negative	/	Negative	Negative	/	/	/	/
8	ICU	BALF	Fungi	Candida tropicalis	C.tropicalis	+	-	-	Not evaluated	Colonization	/	/	/	Pneumonia	160	136	DNA	-	-	A.baumannii	/	Negative	Negative	Negative	/	Negative	Negative	/	/	/	/
8	ICU	BALF	DNA virus	Herpes simplex virus 1	HSV-1	+	+	-	Not evaluated	Non-pathogenic	/	/	/	Pneumonia	7497	6427840	DNA	4043	0.89	A.baumannii	/	Negative	Negative	Negative	/	Negative	Negative	/	/	/	/
8	ICU	BALF	DNA virus	Epstein-Barr virus	EBV	+	+	-	Not evaluated	Non-pathogenic	/	/	/	Pneumonia	2959	25366	DNA	242	0.047	A.baumannii	/	Negative	Negative	Negative	/	Negative	Negative	/	/	/	/
9	No-ICU	BALF	Bacteria	Streptococcus pneumoniae	S.pneumoniae	+	+	+	Definite	Yes	TP	TP	TP	Pneumonia	24498	453750	DNA＋RNA	131444	0.261	S.pneumoniae	Negative	Negative	/	Negative	＜250	Negative	Negative	/	/	/	/
9	No-ICU	BALF	Bacteria	Haemophilus influenzae	H.influenzae	+	+	-	Definite	Yes	TP	TP	FN	Pneumonia	28315	524480	DNA＋RNA	23548	0.085	S.pneumoniae	Negative	Negative	/	Negative	＜250	Negative	Negative	/	/	/	/
9	No-ICU	BALF	DNA virus	Human herpesvirus 6B	HHV-6B	-	+	-	Not evaluated	Non-pathogenic	/	/	/	Pneumonia	-	-	DNA＋RNA	8	0.066	S.pneumoniae	Negative	Negative	/	Negative	＜250	Negative	Negative	/	/	/	/
10	No-ICU	BALF	Fungi	Pichia kudriavzevii	P.kudriavzevii	+	+	-	Not evaluated	Colonization	/	/	/	Pneumonia	29	48	DNA＋RNA	180	0.928	Negative	/	Negative	Positive	Negative	＜250	Negative	Negative	0	0	/	/
10	No-ICU	BALF	RNA virus	Severe acute respiratory syndrome coronavirus 2	SARS-CoV-2	-	+	+	Definite	Yes	FN	TP	TP	Pneumonia	-	-	DNA＋RNA	1869	0.036	Negative	/	Negative	Positive	Negative	＜250	Negative	Negative	0	0	/	/
10	No-ICU	BALF	DNA virus	Human herpesvirus 7	HHV-7	-	+	-	Not evaluated	Non-pathogenic	/	/	/	Pneumonia	-	-	DNA＋RNA	863	0.003	Negative	/	Negative	Positive	Negative	＜250	Negative	Negative	0	0	/	/
10	No-ICU	BALF	DNA virus	Human herpesvirus 6B	HHV-6B	-	+	-	Not evaluated	Non-pathogenic	/	/	/	Pneumonia	-	-	DNA＋RNA	16	0.001	Negative	/	Negative	Positive	Negative	＜250	Negative	Negative	0	0	/	/
10	No-ICU	BALF	DNA virus	Cytomegalo virus	CMV	-	+	-	Not evaluated	Non-pathogenic	/	/	/	Pneumonia	-	-	DNA＋RNA	26	0.001	Negative	/	Negative	Positive	Negative	＜250	Negative	Negative	0	0	/	/
11	ICU	Sputum	Fungi	Pneumocystis jirovecii	P.jirovecii	+	-	-	Probable	Yes	TP	FN	FN	Pneumonia	52	160	DNA＋RNA	-	-	Negative	Negative	Negative	Negative	Negative	＜250	300.15	Negative	0	0	/	/
11	ICU	Sputum	DNA virus	Human herpesvirus 6B	HHV-6B	-	+	-	Not evaluated	Non-pathogenic	/	/	/	Pneumonia	-	-	DNA＋RNA	1078	0.828	Negative	Negative	Negative	Negative	Negative	＜250	300.15	Negative	0	0	/	/
11	ICU	Sputum	DNA virus	Merkel cell polyomavirus	MCPyV	+	-	-	Not evaluated	Non-pathogenic	/	/	/	Pneumonia	105	320	DNA＋RNA	-	-	Negative	Negative	Negative	Negative	Negative	＜250	300.15	Negative	0	0	/	/
11	ICU	Sputum	DNA virus	Cytomegalo virus	CMV	+	-	-	Not evaluated	Non-pathogenic	/	/	/	Pneumonia	176	480	DNA＋RNA	-	-	Negative	Negative	Negative	Negative	Negative	＜250	300.15	Negative	0	0	/	/
11	ICU	Sputum	DNA virus	Epstein-Barr virus	EBV	+	-	-	Not evaluated	Non-pathogenic	/	/	/	Pneumonia	498	960	DNA＋RNA	-	-	Negative	Negative	Negative	Negative	Negative	＜250	300.15	Negative	0	0	/	/
13	No-ICU	BALF	Fungi	Pneumocystis jirovecii	P.jirovecii	+	+	-	Definite	Yes	TP	TP	FN	Pneumonia	157	160	DNA＋RNA	350	0.969	Negative	Negative	Negative	Negative	Negative	＜250	Negative	Negative	/	/	/	/
13	No-ICU	BALF	DNA virus	Cytomegalo virus	CMV	+	-	-	Not evaluated	Non-pathogenic	/	/	/	Pneumonia	112	160	DNA＋RNA	-	-	Negative	Negative	Negative	Negative	Negative	＜250	Negative	Negative	/	/	/	/
14	No-ICU	BALF	All types	/	/	-	-	-	Negative	Negative	TN	TN	TN	No pneumonia	-	-	DNA	-	-	Negative	Negative	Negative	/	/	/	/	/	/	/	/	Sarcoidosis
16	No-ICU	BALF	All types	/	/	-	-	-	Negative	Negative	TN	TN	TN	No pneumonia	-	-	DNA＋RNA	-	-	Negative	Negative	Negative	/	/	/	Negative	Negative	0	0	Negative	Cancer
17	ICU	BALF	Bacteria	Acinetobacter baumannii	A.baumannii	+	+	+	Definite	Yes	TP	TP	TP	Pneumonia	124467	5719424	DNA	7268	0.737	A.baumannii,P.aeruginosa	/	Negative	Negative	Negative	/	/	/	/	/	/	/
17	ICU	BALF	Bacteria	Pseudomonas aeruginosa	P.aeruginosa	+	-	+	Definite	Yes	TP	FN	TP	Pneumonia	36833	1692512	DNA	-	-	A.baumannii,P.aeruginosa	/	Negative	Negative	Negative	/	/	/	/	/	/	/
17	ICU	BALF	Bacteria	Klebsiella aerogenes	K.aerogenes	-	+	-	Possible	No	/	/	/	Pneumonia	16	73	DNA	954	0.042	A.baumannii,P.aeruginosa	/	Negative	Negative	Negative	/	/	/	/	/	/	/
17	ICU	BALF	Fungi	Candida glabrata	C.glabrata	-	+	-	Not evaluated	Colonization	/	/	/	Pneumonia	-	-	DNA	243	0.627	A.baumannii,P.aeruginosa	/	Negative	Negative	Negative	/	/	/	/	/	/	/
17	ICU	BALF	Fungi	Candida tropicalis	C.tropicalis	-	+	-	Not evaluated	Colonization	/	/	/	Pneumonia	-	-	DNA	117	0.256	A.baumannii,P.aeruginosa	/	Negative	Negative	Negative	/	/	/	/	/	/	/
17	ICU	BALF	DNA virus	Cytomegalo virus	CMV	+	+	-	Not evaluated	Non-pathogenic	/	/	/	Pneumonia	126	576	DNA	5	0.001	A.baumannii,P.aeruginosa	/	Negative	Negative	Negative	/	/	/	/	/	/	/
19	No-ICU	BALF	DNA virus	Human herpesvirus 7	HHV-7	-	+	-	Not evaluated	Non-pathogenic	/	/	/	No pneumonia	-	-	DNA＋RNA	6	0.025	Negative	Negative	Negative	Negative	Negative	＜250	Negative	Negative	0	0	/	Cancer
19	No-ICU	BALF	Any other type	/	/	-	-	-	Negative	Negative	TN	TN	TN	No pneumonia	-	-	DNA＋RNA	-	-	Negative	Negative	Negative	Negative	Negative	＜250	Negative	Negative	0	0	/	/
20	ICU	BALF	Bacteria	Klebsiella pneumoniae	K.pneumoniae	+	+	+	Definite	Yes	TP	TP	TP	Pneumonia	84528	1786688	DNA＋RNA	9469	0.738	K.pneumoniae	Negative	Negative	Negative	Negative	＜250	Negative	/	/	/	/	/
20	ICU	BALF	Fungi	Candida albicans	C.albicans	+	+	-	Not evaluated	Colonization	/	/	/	Pneumonia	5407	1142720	DNA＋RNA	17	0.159	K.pneumoniae	Negative	Negative	Negative	Negative	＜250	Negative	/	/	/	/	/
20	ICU	BALF	Fungi	Candida tropicalis	C.tropicalis	+	+	-	Not evaluated	Colonization	/	/	/	Pneumonia	33492	7079360	DNA＋RNA	59	0.521	K.pneumoniae	Negative	Negative	Negative	Negative	＜250	Negative	/	/	/	/	/
20	ICU	BALF	DNA virus	Herpes simplex virus 1	HSV-1	+	-	-	Not evaluated	Non-pathogenic	/	/	/	Pneumonia	325	6864	DNA＋RNA	-	-	K.pneumoniae	Negative	Negative	Negative	Negative	＜250	Negative	/	/	/	/	/
22	No-ICU	BALF	All types	/	/	-	-	-	Negative	Negative	TN	TN	TN	No pneumonia	-	-	DNA＋RNA	-	-	Negative	Negative	Negative	/	Negative	/	Negative	Negative	0	0	Negative	Cancer
23	No-ICU	Sputum	Bacteria	Streptococcus pneumoniae	S.pneumoniae	+	+	-	Definite	Yes	TP	TP	FN	Pneumonia	34339	2021590	DNA＋RNA	4936	0.356	Negative	Negative	C.albicans	Negative	Negative	＜250	Negative	Negative	/	/	/	/
23	No-ICU	Sputum	Fungi	Candida albicans	C.albicans	+	+	+	Not evaluated	Colonization	/	/	/	Pneumonia	76035	4476160	DNA＋RNA	734	0.909	Negative	Negative	C.albicans	Negative	Negative	＜250	Negative	Negative	/	/	/	/
23	No-ICU	Sputum	DNA virus	Epstein-Barr virus	EBV	+	+	-	Not evaluated	Non-pathogenic	/	/	/	Pneumonia	697	4112	DNA＋RNA	9	0.015	Negative	Negative	C.albicans	Negative	Negative	＜250	Negative	Negative	/	/	/	/
24	No-ICU	BALF	Fungi	Aspergillus fumigatus	A.fumigatus	-	+	-	Probable	Yes	FN	TP	FN	No pneumonia	-	-	DNA	2	0.435	Negative	Negative	Negative	/	Negative	＜250	Negative	Negative	0	0	/	/
24	No-ICU	BALF	Fungi	Aspergillus flavus	A.flavus	+	-	-	Unlikely	No	FP	TN	TN	No pneumonia	28	16	DNA	-	-	Negative	Negative	Negative	/	Negative	＜250	Negative	Negative	0	0	/	/
24	No-ICU	BALF	DNA virus	Cytomegalo virus	CMV	+	-	-	Not evaluated	Non-pathogenic	/	/	/	No pneumonia	199	160	DNA	-	-	Negative	Negative	Negative	/	Negative	＜250	Negative	Negative	0	0	/	/
25	No-ICU	BALF	Mycobacteria	Mycobacterium tuberculosis complex	MTBC	+	-	-	Probable	Yes	TP	FN	FN	Pneumonia	130	160	DNA＋RNA	-	-	Negative	Negative	Negative	Negative	Negative	/	Negative	Negative	17	53	/	/
25	No-ICU	BALF	Fungi	Candida albicans	C.albicans	-	+	-	Not evaluated	Colonization	/	/	/	Pneumonia	-	-	DNA＋RNA	13	0.577	Negative	Negative	Negative	Negative	Negative	/	Negative	Negative	17	53	/	/
25	No-ICU	BALF	RNA virus	Rhinovirus C	RV-C	-	+	-	Probable	Yes	FN	TP	FN	Pneumonia	-	-	DNA＋RNA	159	0.879	Negative	Negative	Negative	Negative	Negative	/	Negative	Negative	17	53	/	/
26	No-ICU	BALF	Bacteria	Haemophilus influenzae	H.influenzae	+	+	-	Definite	Yes	TP	TP	FN	Pneumonia	1053	800	DNA	34838	0.366	Negative	Negative	Negative	Negative	/	/	Negative	Negative	/	/	Negative	/
26	No-ICU	BALF	Bacteria	Nocardia cyriacigeorgica	N.cyriacigeorgica	+	-	-	Possible	No	/	/	/	Pneumonia	33	16	DNA	-	-	Negative	Negative	Negative	Negative	/	/	Negative	Negative	/	/	Negative	/
26	No-ICU	BALF	Bacteria	Nocardia abscessus	N.abscessus	+	-	-	Possible	No	/	/	/	Pneumonia	33	16	DNA	-	-	Negative	Negative	Negative	Negative	/	/	Negative	Negative	/	/	Negative	/
26	No-ICU	BALF	Mycobacteria	Mycobacterium tuberculosis complex	MTBC	+	-	-	Probable	Yes	TP	FN	FN	Pneumonia	170	160	DNA	-	-	Negative	Negative	Negative	Negative	/	/	Negative	Negative	/	/	/	/
26	No-ICU	BALF	DNA virus	Epstein-Barr virus	EBV	+	+	-	Not evaluated	Non-pathogenic	/	/	/	Pneumonia	334	320	DNA	449	0.049	Negative	Negative	Negative	Negative	/	/	Negative	Negative	/	/	Negative	/
26	No-ICU	BALF	DNA virus	Cytomegalo virus	CMV	-	+	-	Not evaluated	Non-pathogenic	/	/	/	Pneumonia	-	-	DNA	19	0.001	Negative	Negative	Negative	Negative	/	/	Negative	Negative	/	/	Negative	/
28	No-ICU	BALF	Mycobacteria	Mycobacterium avium complex	MAC	+	+	-	Definite	Yes	TP	TP	FN	Pneumonia	69320	88160	DNA＋RNA	413	0.019	Negative	Negative	Negative	/	/	/	Negative	Negative	0	0	Negative	/
28	No-ICU	BALF	Fungi	Cladosporium cladosporioides	C.cladosporioides	+	-	-	Not evaluated	Colonization	/	/	/	Pneumonia	85	160	DNA＋RNA	-	-	Negative	Negative	Negative	/	/	/	Negative	Negative	0	0	Negative	/
28	No-ICU	BALF	DNA virus	Human herpesvirus 7	HHV-7	-	+	-	Not evaluated	Non-pathogenic	/	/	/	Pneumonia	-	-	DNA＋RNA	26	0.907	Negative	Negative	Negative	/	/	/	Negative	Negative	0	0	Negative	/
28	No-ICU	BALF	DNA virus	Epstein-Barr virus	EBV	+	-	-	Not evaluated	Non-pathogenic	/	/	/	Pneumonia	652	960	DNA＋RNA	-	-	Negative	Negative	Negative	/	/	/	Negative	Negative	0	0	Negative	/
29	No-ICU	BALF	Fungi	Pneumocystis jirovecii	P.jirovecii	+	+	-	Definite	Yes	TP	TP	FN	Pneumonia	25	16	DNA＋RNA	23	0.803	Negative	Negative	Negative	Negative	Negative	＜250	Negative	Negative	0	0	/	/
30	ICU	BALF	Bacteria	Acinetobacter baumannii	A.baumannii	+	+	+	Definite	Yes	TP	TP	TP	Pneumonia	144201	8005744	DNA＋RNA	74217	0.728	A.baumannii	/	Negative	Negative	/	＜250	Negative	Negative	/	/	/	/
31	No-ICU	BALF	DNA virus	Human herpesvirus 7	HHV-7	-	+	-	Not evaluated	Non-pathogenic	/	/	/	Pneumonia	-	-	DNA＋RNA	25	0.001	Negative	/	Negative	Negative	/	284.88	Negative	Negative	/	/	/	/
31	No-ICU	BALF	DNA virus	Cytomegalo virus	CMV	+	+	+	Definite	Yes	TP	TP	TP	Pneumonia	1162	47165	DNA＋RNA	1090	0.019	Negative	/	Negative	Negative	/	284.88	Negative	Negative	/	/	/	After lung transplantation
32	No-ICU	Sputum	Fungi	Candida tropicalis	C.tropicalis	+	+	-	Not evaluated	Colonization	/	/	/	Pneumonia	5020	1582333	DNA＋RNA	12934	0.919	Negative	Negative	Negative	Negative	IAV	＜250	Negative	Negative	6	15	Negative	/
32	No-ICU	Sputum	DNA virus	Herpes simplex virus 1	HSV-1	+	+	-	Not evaluated	Non-pathogenic	/	/	/	Pneumonia	6564	2482972	DNA＋RNA	13	0.001	Negative	Negative	Negative	Negative	IAV	＜250	Negative	Negative	6	15	Negative	/
32	No-ICU	Sputum	RNA virus	Influenza A virus	IAV	+	+	+	Definite	Yes	TP	TP	TP	Pneumonia	60622	1910905	DNA＋RNA	9024	0.176	Negative	Negative	Negative	Negative	IAV	＜250	Negative	Negative	6	15	Negative	/
34	No-ICU	BALF	Bacteria	Streptococcus pneumoniae	S.pneumoniae	+	-	-	Unlikely	No	FP	TN	TN	No pneumonia	8491	81827	DNA＋RNA	-	-	Negative	Negative	Negative	/	Negative	＜250	Negative	Negative	8	8	/	Cancer
36	ICU	BALF	Bacteria	Enterococcus faecium	E.faecium	+	+	-	Definite	Yes	TP	TP	FN	Pneumonia	9978	191825	DNA＋RNA	4721	0.304	Negative	Negative	Negative	Negative	/	＜250	Negative	Negative	/	/	Negative	/
36	ICU	BALF	Fungi	Pneumocystis jirovecii	P.jirovecii	-	+	-	Unlikely	No	TN	FP	TN	Pneumonia	-	-	DNA＋RNA	11	0.003	Negative	Negative	Negative	Negative	/	＜250	Negative	Negative	/	/	Negative	/
36	ICU	BALF	Fungi	Candida albicans	C.albicans	+	+	-	Not evaluated	Colonization	/	/	/	Pneumonia	2377	45706	DNA＋RNA	6641	0.989	Negative	Negative	Negative	Negative	/	＜250	Negative	Negative	/	/	Negative	/
36	ICU	BALF	RNA virus	Influenza A virus	IAV	+	+	-	Definite	Yes	TP	TP	FN	Pneumonia	17938	344873	DNA＋RNA	5730	0.981	Negative	Negative	Negative	Negative	/	＜250	Negative	Negative	/	/	Negative	/
39	No-ICU	BALF	Bacteria	Enterococcus faecalis	E.faecalis	+	+	-	Definite	Yes	TP	TP	FN	Pneumonia	146150	8517920	DNA＋RNA	54545	0.903	Negative	Negative	Negative	Negative	Negative	＜250	968.94	Negative	0	0	/	Use of Meropenem
39	No-ICU	BALF	Fungi	Candida albicans	C.albicans	+	+	-	Not evaluated	Colonization	/	/	/	Pneumonia	4908	28608	DNA＋RNA	17905	0.921	Negative	Negative	Negative	Negative	Negative	＜250	968.94	Negative	0	0	/	Use of Meropenem
39	No-ICU	BALF	DNA virus	Human herpesvirus 7	HHV-7	-	+	-	Not evaluated	Non-pathogenic	/	/	/	Pneumonia	-	-	DNA＋RNA	8	0.001	Negative	Negative	Negative	Negative	Negative	＜250	968.94	Negative	0	0	/	Use of Meropenem
39	No-ICU	BALF	RNA virus	Influenza A virus	IAV	+	+	-	Definite	Yes	TP	TP	FN	Pneumonia	920	5360	DNA＋RNA	599	0.179	Negative	Negative	Negative	Negative	Negative	＜250	968.94	Negative	0	0	/	Use of Meropenem
39	No-ICU	BALF	DNA virus	Epstein-Barr virus	EBV	-	+	-	Not evaluated	Non-pathogenic	/	/	/	Pneumonia	-	-	DNA＋RNA	54	0.001	Negative	Negative	Negative	Negative	Negative	＜250	968.94	Negative	0	0	/	Use of Meropenem
40	No-ICU	BALF	All types	/	/	-	-	-	Negative	Negative	TN	TN	TN	No pneumonia	-	-	DNA＋RNA	-	-	Negative	Negative	Negative	/	Negative	/	Negative	Negative	11	7	Negative	/
41	No-ICU	BALF	Fungi	Aspergillus flavus	A.flavus	+	+	-	Definite	Yes	TP	TP	FN	Pneumonia	22484	214240	DNA＋RNA	982	0.152	Negative	Negative	Negative	/	Negative	/	Negative	Negative	0	0	/	/
42	No-ICU	BALF	Fungi	Candida albicans	C.albicans	-	+	-	Not evaluated	Colonization	/	/	/	No pneumonia	-	-	DNA＋RNA	13	0.817	Negative	Negative	Negative	/	Negative	＜250	Negative	Negative	/	/	/	/
42	No-ICU	BALF	DNA virus	Merkel cell polyomavirus	MCPyV	+	+	-	Not evaluated	Non-pathogenic	/	/	/	No pneumonia	296	320	DNA＋RNA	34	0.799	Negative	Negative	Negative	/	Negative	＜250	Negative	Negative	/	/	/	/
42	No-ICU	BALF	Any other type	/	/	-	-	-	Negative	Negative	TN	TN	TN	No pneumonia	-	-	DNA＋RNA	-	-	Negative	Negative	Negative	/	Negative	＜250	Negative	Negative	/	/	/	/
43	ICU	BALF	DNA virus	Human herpesvirus 7	HHV-7	-	+	-	Not evaluated	Non-pathogenic	/	/	/	No pneumonia	-	-	DNA＋RNA	8	0.002	Negative	/	Negative	Negative	Negative	＜250	186.08	Negative	/	/	Negative	Pulmonary infiltrates in leukemia
43	ICU	BALF	DNA virus	Herpes simplex virus 1	HSV-1	+	+	-	Not evaluated	Non-pathogenic	/	/	/	No pneumonia	133767	7455200	DNA＋RNA	4268	0.998	Negative	/	Negative	Negative	Negative	＜250	186.08	Negative	/	/	Negative
43	ICU	BALF	Any other type	/	/	-	-	-	Negative	Negative	TN	TN	TN	No pneumonia	-	-	DNA＋RNA	-	-	Negative	/	Negative	Negative	Negative	＜250	186.08	Negative	/	/	Negative	/
45	ICU	Sputum	Mycobacteria	Mycobacterium tuberculosis complex	MTBC	+	+	+	Definite	Yes	TP	TP	TP	Pneumonia	177100	1824848	DNA	11042	0.812	Negative	MTBC	Negative	Negative	Negative	＜250	Negative	Negative	/	/	Positive	/
45	ICU	Sputum	DNA virus	Epstein-Barr virus	EBV	+	-	-	Not evaluated	Non-pathogenic	/	/	/	Pneumonia	968	9984	DNA	-	-	Negative	MTBC	Negative	Negative	Negative	＜250	Negative	Negative	/	/	Positive	/
47	ICU	BALF	Bacteria	Acinetobacter baumannii	A.baumannii	+	+	+	Definite	Yes	TP	TP	TP	Pneumonia	131869	1862416	DNA＋RNA	66265	0.789	A.baumannii	/	Negative	Positive	Negative	＜250	Negative	/	/	/	/	/
47	ICU	BALF	Fungi	Candida albicans	C.albicans	+	+	-	Not evaluated	Colonization	/	/	/	Pneumonia	79	111	DNA＋RNA	3	0.16	A.baumannii	/	Negative	Positive	Negative	＜250	Negative	/	/	/	/	/
47	ICU	BALF	RNA virus	Severe acute respiratory syndrome coronavirus 2	SARS-CoV-2	-	+	+	Definite	Yes	FN	TP	TP	Pneumonia	-	-	DNA＋RNA	5	0.025	A.baumannii	/	Negative	Positive	Negative	＜250	Negative	/	/	/	/	/
47	ICU	BALF	DNA virus	Herpes simplex virus 1	HSV-1	+	+	-	Not evaluated	Non-pathogenic	/	/	/	Pneumonia	768	1084	DNA＋RNA	5	0.001	A.baumannii	/	Negative	Positive	Negative	＜250	Negative	/	/	/	/	/
48	ICU	BALF	Bacteria	Klebsiella pneumoniae	K.pneumoniae	+	+	+	Definite	Yes	TP	TP	TP	Pneumonia	40780	1690560	DNA＋RNA	27662	0.246	K.pneumoniae	Negative	Negative	Negative	Negative	＜250	Negative	Negative	/	/	Negative	/
48	ICU	BALF	DNA virus	Herpes simplex virus 1	HSV-1	+	+	-	Not evaluated	Non-pathogenic	/	/	/	Pneumonia	25592	1060960	DNA＋RNA	4498	0.974	K.pneumoniae	Negative	Negative	Negative	Negative	＜250	Negative	Negative	/	/	Negative	/
48	ICU	BALF	DNA virus	Epstein-Barr virus	EBV	-	+	-	Not evaluated	Non-pathogenic	/	/	/	Pneumonia	-	-	DNA＋RNA	41	0.008	K.pneumoniae	Negative	Negative	Negative	Negative	＜250	Negative	Negative	/	/	Negative	/
48	ICU	BALF	DNA virus	Cytomegalo virus	CMV	-	+	-	Not evaluated	Non-pathogenic	/	/	/	Pneumonia	-	-	DNA＋RNA	66	0.009	K.pneumoniae	Negative	Negative	Negative	Negative	＜250	Negative	Negative	/	/	Negative	/
49	ICU	BALF	Bacteria	Acinetobacter baumannii	A.baumannii	+	-	-	Possible	No	/	/	/	Pneumonia	53082	1681120	DNA＋RNA	-	-	Negative	/	Negative	Negative	Negative	＜250	Negative	Negative	/	/	/	/
49	ICU	BALF	Fungi	Pneumocystis jirovecii	P.jirovecii	+	+	-	Definite	Yes	TP	TP	FN	Pneumonia	2	16	DNA＋RNA	18	0.098	Negative	/	Negative	Negative	Negative	＜250	Negative	Negative	/	/	/	/
49	ICU	BALF	DNA virus	Herpes simplex virus 1	HSV-1	+	-	-	Not evaluated	Non-pathogenic	/	/	/	Pneumonia	134	432	DNA＋RNA	-	-	Negative	/	Negative	Negative	Negative	＜250	Negative	Negative	/	/	/	/
51	ICU	BALF	Bacteria	Pseudomonas aeruginosa	P.aeruginosa	+	+	+	Definite	Yes	TP	TP	TP	Pneumonia	54000	4216064	DNA＋RNA	22932	0.664	P.aeruginosa	Negative	Negative	Negative	/	＜250	Negative	Negative	/	/	/	/
51	ICU	BALF	Bacteria	Stenotrophomonas maltophilia	S.maltophilia	+	+	-	Definite	Yes	TP	TP	FN	Pneumonia	44516	3475600	DNA＋RNA	2068	0.075	P.aeruginosa	Negative	Negative	Negative	/	＜250	Negative	Negative	/	/	/	/
51	ICU	BALF	Bacteria	Elizabethkingia anophelis	E.anophelis	+	+	-	Definite	No	/	/	/	Pneumonia	40936	3196064	DNA＋RNA	262	0.015	P.aeruginosa	Negative	Negative	Negative	/	＜250	Negative	Negative	/	/	/	/
51	ICU	BALF	Fungi	Candida albicans	C.albicans	+	+	-	Not evaluated	Colonization	/	/	/	Pneumonia	481	3752	DNA＋RNA	5	0.136	P.aeruginosa	Negative	Negative	Negative	/	＜250	Negative	Negative	/	/	/	/
51	ICU	BALF	DNA virus	Herpes simplex virus 1	HSV-1	+	+	-	Not evaluated	Non-pathogenic	/	/	/	Pneumonia	532	4152	DNA＋RNA	19	0.056	P.aeruginosa	Negative	Negative	Negative	/	＜250	Negative	Negative	/	/	/	/
51	ICU	BALF	DNA virus	Epstein-Barr virus	EBV	+	+	-	Not evaluated	Non-pathogenic	/	/	/	Pneumonia	1619	12635	DNA＋RNA	76	0.199	P.aeruginosa	Negative	Negative	Negative	/	＜250	Negative	Negative	/	/	/	/
51	ICU	BALF	DNA virus	Cytomegalo virus	CMV	+	+	-	Not evaluated	Non-pathogenic	/	/	/	Pneumonia	419	3268	DNA＋RNA	13	0.025	P.aeruginosa	Negative	Negative	Negative	/	＜250	Negative	Negative	/	/	/	/
52	No-ICU	BALF	DNA virus	Epstein-Barr virus	EBV	+	+	-	Not evaluated	Non-pathogenic	/	/	/	Pneumonia	1275	960	DNA＋RNA	50	0.954	Negative	Negative	Negative	Negative	Negative	＜250	Negative	Negative	/	/	/	/
52	No-ICU	BALF	Any other type	/	/	-	-	-	Negative	Negative	FN	FN	FN	Pneumonia	-	-	DNA＋RNA	-	-	Negative	Negative	Negative	Negative	Negative	＜250	Negative	Negative	/	/	/	/
55	No-ICU	BALF	Mycobacteria	Mycobacterium tuberculosis complex	MTBC	+	+	+	Definite	Yes	TP	TP	TP	Pneumonia	454953	2192560	DNA＋RNA	3798	0.347	Negative	MTBC	Negative	Negative	Negative	＜250	Negative	Negative	/	/	Positive	/
55	No-ICU	BALF	Fungi	Candida albicans	C.albicans	+	+	-	Not evaluated	Colonization	/	/	/	Pneumonia	790	380	DNA＋RNA	71	0.872	Negative	MTBC	Negative	Negative	Negative	＜250	Negative	Negative	/	/	Positive	/
55	No-ICU	BALF	DNA virus	Epstein-Barr virus	EBV	+	-	-	Not evaluated	Colonization	/	/	/	Pneumonia	598	289	DNA＋RNA	-	-	Negative	MTBC	Negative	Negative	Negative	＜250	Negative	Negative	/	/	Positive	/
56	No-ICU	BALF	Bacteria	Staphylococcus aureus	S.aureus	+	+	-	Definite	Yes	TP	TP	FN	Pneumonia	953164	1089330	DNA＋RNA	17556	0.379	Negative	Negative	Negative	Negative	Negative	＜250	Negative	Negative	/	/	/	/
56	No-ICU	BALF	DNA virus	Epstein-Barr virus	EBV	+	+	-	Not evaluated	Non-pathogenic	/	/	/	Pneumonia	3607	4122	DNA＋RNA	20	0.817	Negative	Negative	Negative	Negative	Negative	＜250	Negative	Negative	/	/	/	/
56	No-ICU	BALF	DNA virus	Human herpesvirus 7	HHV-7	+	-	-	Not evaluated	Non-pathogenic	/	/	/	Pneumonia	733	837	DNA＋RNA	-	-	Negative	Negative	Negative	Negative	Negative	＜250	Negative	Negative	/	/	/	/
57	ICU	BALF	Bacteria	Streptococcus pneumoniae	S.pneumoniae	+	-	-	Probable	Yes	TP	FN	FN	Pneumonia	220959	3379928	DNA＋RNA	-	-	Negative	Negative	Negative	Negative	Negative	＜250	Negative	Negative	/	/	/	/
57	ICU	BALF	DNA virus	Human herpesvirus 7	HHV-7	+	-	-	Not evaluated	Non-pathogenic	/	/	/	Pneumonia	865	132	DNA＋RNA	-	-	Negative	Negative	Negative	Negative	Negative	＜250	Negative	Negative	/	/	/	/
63	No-ICU	BALF	Bacteria	Pseudomonas aeruginosa	P.aeruginosa	+	+	-	Definite	Yes	TP	TP	FN	Pneumonia	408	464	DNA＋RNA	142	0.051	Negative	Negative	Negative	/	Negative	/	/	Negative	0	0	Negative	/
63	No-ICU	BALF	DNA virus	Cytomegalo virus	CMV	+	+	-	Not evaluated	Non-pathogenic	/	/	/	Pneumonia	773	864	DNA＋RNA	111	0.013	Negative	Negative	Negative	/	Negative	/	/	Negative	0	0	Negative	/
64	No-ICU	BALF	Bacteria	Pseudomonas aeruginosa	P.aeruginosa	+	+	-	Definite	Yes	TP	TP	FN	Pneumonia	930	480	DNA＋RNA	174	0.022	Negative	Negative	Negative	/	Negative	/	/	Negative	/	/	Negative	/
64	No-ICU	BALF	Bacteria	Burkholderia multivorans	B.multivorans	+	-	-	Possible	No	/	/	/	Pneumonia	901	480	DNA＋RNA	-	-	Negative	Negative	Negative	/	Negative	/	/	Negative	/	/	Negative	/
67	ICU	BALF	Bacteria	Corynebacterium striatum	C.striatum	+	+	-	Definite	Yes	TP	TP	FN	Pneumonia	1087290	4956320	DNA＋RNA	35320	0.838	Negative	Negative	Negative	Negative	Negative	＜250	Negative	Negative	/	/	Negative	/
67	ICU	BALF	Fungi	Candida tropicalis	C.tropicalis	+	+	-	Not evaluated	Colonization	/	/	/	Pneumonia	898	409	DNA＋RNA	3	0.073	Negative	Negative	Negative	Negative	Negative	＜250	Negative	Negative	/	/	Negative	/
67	ICU	BALF	Fungi	Candida albicans	C.albicans	+	-	-	Not evaluated	Colonization	/	/	/	Pneumonia	606	276	DNA＋RNA	-	-	Negative	Negative	Negative	Negative	Negative	＜250	Negative	Negative	/	/	Negative	/
67	ICU	BALF	DNA virus	Epstein-Barr virus	EBV	+	+	-	Not evaluated	Non-pathogenic	/	/	/	Pneumonia	1733	790	DNA＋RNA	3	0.007	Negative	Negative	Negative	Negative	Negative	＜250	Negative	Negative	/	/	Negative	/
67	ICU	BALF	DNA virus	Cytomegalo virus	CMV	+	+	-	Not evaluated	Non-pathogenic	/	/	/	Pneumonia	22618	10310	DNA＋RNA	12	0.02	Negative	Negative	Negative	Negative	Negative	＜250	Negative	Negative	/	/	Negative	/
67	ICU	BALF	DNA virus	Human herpesvirus 7	HHV-7	+	-	-	Not evaluated	Non-pathogenic	/	/	/	Pneumonia	1512	689	DNA＋RNA	-	-	Negative	Negative	Negative	Negative	Negative	＜250	Negative	Negative	/	/	Negative	/
68	ICU	Sputum	Fungi	Candida albicans	C.albicans	+	+	-	Not evaluated	Colonization	/	/	/	Pneumonia	258050	2949144	DNA＋RNA	108181	0.995	Negative	/	Negative	Positive	/	401	Negative	Negative	/	/	/	/
68	ICU	Sputum	RNA virus	Severe acute respiratory syndrome coronavirus 2	SARS-CoV-2	+	+	+	Definite	Yes	TP	TP	TP	Pneumonia	8900	1017	DNA＋RNA	1355	0.904	Negative	/	Negative	Positive	/	401	Negative	Negative	/	/	/	/
68	ICU	Sputum	DNA virus	Human herpesvirus 7	HHV-7	+	+	-	Not evaluated	Non-pathogenic	/	/	/	Pneumonia	2267	2590	DNA＋RNA	13	0.001	Negative	/	Negative	Positive	/	401	Negative	Negative	/	/	/	/
68	ICU	Sputum	DNA virus	Epstein-Barr virus	EBV	-	+	-	Not evaluated	Non-pathogenic	/	/	/	Pneumonia	-	-	DNA＋RNA	10	0.001	Negative	/	Negative	Positive	/	401	Negative	Negative	/	/	/	/
68	ICU	Sputum	DNA virus	Cytomegalo virus	CMV	+	+	+	Definite	Yes	TP	TP	TP	Pneumonia	1987	2270	DNA＋RNA	93	0.004	Negative	/	Negative	Positive	/	401	Negative	Negative	/	/	/	/
69	ICU	BALF	Bacteria	Acinetobacter baumannii	A.baumannii	+	+	+	Definite	Yes	TP	TP	TP	Pneumonia	111592	1487894	DNA＋RNA	234020	0.43	A.baumannii	/	Negative	Negative	Negative	＜250	/	/	/	/	/	/
69	ICU	BALF	Fungi	Candida albicans	C.albicans	+	+	-	Not evaluated	Colonization	/	/	/	Pneumonia	240	320	DNA＋RNA	32	0.658	A.baumannii	/	Negative	Negative	Negative	＜250	/	/	/	/	/	/
69	ICU	BALF	RNA virus	Influenza A virus	IAV	-	+	-	Probable	Yes	FN	TP	FN	Pneumonia	-	-	DNA＋RNA	119	0.218	A.baumannii	/	Negative	Negative	Negative	＜250	/	/	/	/	/	/
69	ICU	BALF	DNA virus	Cytomegalo virus	CMV	-	+	-	Not evaluated	Non-pathogenic	/	/	/	Pneumonia	-	-	DNA＋RNA	13	0.001	A.baumannii	/	Negative	Negative	Negative	＜250	/	/	/	/	/	/
70	ICU	BALF	Bacteria	Staphylococcus aureus	S.aureus	+	+	+	Definite	Yes	TP	TP	TP	Pneumonia	263751	2110008	DNA	8710	0.224	S.aureus	/	Negative	Negative	Negative	＜250	/	/	/	/	/	/
70	ICU	BALF	Bacteria	Klebsiella pneumoniae	K.pneumoniae	+	+	-	Definite	Yes	TP	TP	FN	Pneumonia	49633	3970640	DNA	5956	0.225	S.aureus	/	Negative	Negative	Negative	＜250	/	/	/	/	/	/
70	ICU	BALF	DNA virus	Herpes simplex virus 1	HSV-1	+	+	-	Not evaluated	Non-pathogenic	/	/	/	Pneumonia	1664	1331	DNA	81	0.085	S.aureus	/	Negative	Negative	Negative	＜250	/	/	/	/	/	/
70	ICU	BALF	DNA virus	Epstein-Barr virus	EBV	+	+	+	Definite	Yes	TP	TP	TP	Pneumonia	106	84	DNA	14	0.015	S.aureus	/	Negative	Negative	Negative	＜250	/	/	/	/	/	/
70	ICU	BALF	DNA virus	Cytomegalo virus	CMV	+	+	-	Not evaluated	Non-pathogenic	/	/	/	Pneumonia	316	252	DNA	144	0.091	S.aureus	/	Negative	Negative	Negative	＜250	/	/	/	/	/	/
71	No-ICU	BALF	Fungi	Pneumocystis jirovecii	P.jirovecii	-	+	-	Unlikely	No	TN	FP	TN	No pneumonia	-	-	DNA＋RNA	8	0.683	Negative	Negative	Negative	/	/	/	Negative	/	/	/	Negative	/
71	No-ICU	BALF	DNA virus	Cytomegalo virus	CMV	-	+	-	Not evaluated	Non-pathogenic	/	/	/	No pneumonia	-	-	DNA＋RNA	141	0.017	Negative	Negative	Negative	/	/	/	Negative	/	/	/	Negative	/
72	No-ICU	BALF	Fungi	Candida albicans	C.albicans	-	+	-	Probable	Yes	FN	TP	FN	Pneumonia	-	-	DNA＋RNA	587	0.94	Negative	Negative	Negative	Negative	/	＜250	/	Negative	/	/	Negative	History of hematopoietic stem cell transplantation
72	No-ICU	BALF	RNA virus	Hepatitis C virus	HCV	Out of detection range	+	-	Not evaluated	Non-pathogenic	/	/	/	Pneumonia	-	-	DNA＋RNA	9	0.642	Negative	Negative	Negative	Negative	/	＜250	/	Negative	/	/	Negative	History of hematopoietic stem cell transplantation
72	No-ICU	BALF	DNA virus	Epstein-Barr virus	EBV	+	+	-	Definite	Yes	TP	TP	FN	Pneumonia	1122	1040	DNA＋RNA	84	0.347	Negative	Negative	Negative	Negative	/	＜250	/	Negative	/	/	Negative	History of hematopoietic stem cell transplantation
73	No-ICU	BALF	Bacteria	Staphylococcus aureus	S.aureus	-	+	-	Unlikely	No	TN	FP	TN	No pneumonia	-	-	DNA	16	0.043	Negative	Negative	Negative	/	/	/	Negative	Negative	/	/	Negative	/
74	No-ICU	BALF	Bacteria	Pseudomonas aeruginosa	P.aeruginosa	-	+	-	Unlikely	No	TN	FP	TN	No pneumonia	-	-	DNA＋RNA	163	0.123	Negative	Negative	Negative	/	/	/	Negative	Negative	/	/	Negative	Cancer
75	No-ICU	BALF	All types	/	/	-	-	-	Negative	Negative	TN	TN	TN	No pneumonia	-	-	DNA＋RNA	-	-	Negative	Negative	Negative	Negative	Negative	＜250	Negative	Negative	/	/	Negative	Cancer
76	No-ICU	BALF	Fungi	Pneumocystis jirovecii	P.jirovecii	+	+	-	Definite	Yes	TP	TP	FN	Pneumonia	15	16	DNA＋RNA	28	0.237	Negative	Negative	Negative	Positive	Negative	＜250	Negative	Negative	/	/	Negative	/
76	No-ICU	BALF	Fungi	Candida glabrata	C.glabrata	-	+	-	Not evaluated	Colonization	/	/	/	Pneumonia	-	-	DNA＋RNA	63	0.362	Negative	Negative	Negative	Positive	Negative	＜250	Negative	Negative	/	/	Negative	/
76	No-ICU	BALF	Fungi	Candida tropicalis	C.tropicalis	-	+	-	Not evaluated	Colonization	/	/	/	Pneumonia	-	-	DNA＋RNA	60	0.325	Negative	Negative	Negative	Positive	Negative	＜250	Negative	Negative	/	/	Negative	/
76	No-ICU	BALF	RNA virus	Severe acute respiratory syndrome coronavirus 2	SARS-CoV-2	+	+	+	Definite	Yes	TP	TP	TP	Pneumonia	2630	1808	DNA＋RNA	25910	0.88	Negative	Negative	Negative	Positive	Negative	＜250	Negative	Negative	/	/	Negative	/
76	No-ICU	BALF	DNA virus	Cytomegalo virus	CMV	+	-	-	Not evaluated	Non-pathogenic	/	/	/	Pneumonia	1205	832	DNA＋RNA	-	-	Negative	Negative	Negative	Positive	Negative	＜250	Negative	Negative	/	/	Negative	/
77	ICU	BALF	Mycoplasma	Mycoplasma pneumoniae	M.pneumoniae	-	-	+	Definite	Yes	FN	FN	TP	Pneumonia	-	-	DNA	-	-	Negative	Negative	Negative	Negative	M.pneumoniae	＜250	Negative	Negative	/	/	Negative	/
77	ICU	BALF	Fungi	Candida glabrata	C.glabrata	+	+	-	Not evaluated	Colonization	/	/	/	Pneumonia	85760	430240	DNA	205	0.648	Negative	Negative	Negative	Negative	Negative	＜250	Negative	Negative	/	/	Negative	/
77	ICU	BALF	Fungi	Candida tropicalis	C.tropicalis	+	+	-	Not evaluated	Colonization	/	/	/	Pneumonia	21545	10816	DNA	114	0.302	Negative	Negative	Negative	Negative	Negative	＜250	Negative	Negative	/	/	Negative	/
77	ICU	BALF	DNA virus	Human herpesvirus 7	HHV-7	+	-	-	Not evaluated	Non-pathogenic	/	/	/	Pneumonia	2483	1248	DNA	-	-	Negative	Negative	Negative	Negative	Negative	＜250	Negative	Negative	/	/	Negative	/
78	No-ICU	BALF	Bacteria	Pseudomonas aeruginosa	P.aeruginosa	-	+	-	Probable	Yes	FN	TP	FN	Pneumonia	-	-	DNA＋RNA	67	0.017	Negative	Negative	Negative	Negative	Negative	＜250	Negative	Negative	/	/	Negative	/
79	No-ICU	BALF	Bacteria	Tropheryma hipplei	T.whipplei	-	+	-	Unlikely	No	TN	FP	TN	No pneumonia	-	-	DNA	154	0.541	Negative	Negative	Negative	/	Negative	＜250	Negative	Negative	/	/	Negative	/
80	ICU	Sputum	RNA virus	Rhinovirus C	RV-C	-	+	-	Possible	No	TN	FP	TN	No pneumonia	-	-	DNA＋RNA	158	0.677	Negative	Negative	Negative	Negative	Negative	＜250	Negative	Negative	/	/	Negative	Cryptogenic organizing pneumonia
80	ICU	Sputum	DNA virus	Herpes simplex virus 1	HSV-1	+	-	-	Not evaluated	Non-pathogenic	/	/	/	No pneumonia	7185	12416	DNA＋RNA	-	-	Negative	Negative	Negative	Negative	Negative	＜250	Negative	Negative	/	/	Negative	Cryptogenic organizing pneumonia
81	ICU	BALF	Bacteria	Escherichia coli	E.coli	+	+	+	Definite	Yes	TP	TP	TP	Pneumonia	182262	6×10^6	DNA＋RNA	48959	0.176	E.coli	Negative	C.tropicalis, C.glabratus, P.kudriavzevii	Positive	Negative	＜250	Negative	Negative	/	/	Negative	/
81	ICU	BALF	Fungi	Candida tropicalis	C.tropicalis	+	+	+	Not evaluated	Colonization	/	/	/	Pneumonia	184330	6×10^6	DNA＋RNA	135151	0.759	E.coli	Negative	C.tropicalis, C.glabratus, P.kudriavzevii	Positive	Negative	＜250	Negative	Negative	/	/	Negative	/
81	ICU	BALF	Fungi	Candida glabrata	C.glabrata	+	+	+	Not evaluated	Colonization	/	/	/	Pneumonia	16003	5×10^4	DNA＋RNA	9795	0.065	E.coli	Negative	C.tropicalis, C.glabratus, P.kudriavzevii	Positive	Negative	＜250	Negative	Negative	/	/	Negative	/
81	ICU	BALF	Fungi	Pichia kudriavzevii	P.kudriavzevii	+	+	+	Not evaluated	Colonization	/	/	/	Pneumonia	10043	3×10^4	DNA＋RNA	4057	0.029	E.coli	Negative	C.tropicalis, C.glabratus, P.kudriavzevii	Positive	Negative	＜250	Negative	Negative	/	/	Negative	/
81	ICU	BALF	Fungi	Candida albicans	C.albicans	+	+	-	Not evaluated	Colonization	/	/	/	Pneumonia	21310	7×10^6	DNA＋RNA	14053	0.088	E.coli	Negative	C.tropicalis, C.glabratus, P.kudriavzevii	Positive	Negative	＜250	Negative	Negative	/	/	Negative	/
81	ICU	BALF	RNA virus	Severe acute respiratory syndrome coronavirus 2	SARS-CoV-2	+	+	+	Definite	Yes	TP	TP	TP	Pneumonia	1236	4×10^3	DNA＋RNA	35630	0.95	E.coli	Negative	C.tropicalis, C.glabratus, P.kudriavzevii	Positive	Negative	＜250	Negative	Negative	/	/	Negative	/
81	ICU	BALF	DNA virus	Cytomegalo virus	CMV	+	-	-	Not evaluated	Non-pathogenic	/	/	/	Pneumonia	718	2×10^2	DNA＋RNA	-	-	E.coli	Negative	C.tropicalis, C.glabratus, P.kudriavzevii	Positive	Negative	＜250	Negative	Negative	/	/	Negative	/
82	ICU	BALF	DNA virus	Merkel cell polyomavirus	MCPyV	+	-	-	Not evaluated	Non-pathogenic	/	/	/	Pneumonia	134	3×10^2	DNA＋RNA	-	-	Negative	Negative	Negative	/	Negative	＜250	/	/	/	/	/	/
82	ICU	BALF	DNA virus	Human herpesvirus 7	HHV-7	+	-	-	Not evaluated	Non-pathogenic	/	/	/	Pneumonia	202	5×10^2	DNA＋RNA	-	-	Negative	Negative	Negative	/	Negative	＜250	/	/	/	/	/	/
82	ICU	BALF	DNA virus	Epstein-Barr virus	EBV	+	-	-	Not evaluated	Non-pathogenic	/	/	/	Pneumonia	153	4×10^2	DNA＋RNA	-	-	Negative	Negative	Negative	/	Negative	＜250	/	/	/	/	/	/
82	ICU	BALF	Any other type	/	/	-	-	-	Negative	Negative	FN	FN	FN	Pneumonia	-	-	DNA＋RNA	-	-	Negative	Negative	Negative	/	Negative	＜250	/	/	/	/	/	/
83	No-ICU	BALF	Bacteria	Acinetobacter baumannii	A.baumannii	+	-	-	Probable	Yes	TP	FN	FN	Pneumonia	1326	8×10^3	DNA＋RNA	-	-	Negative	Negative	Negative	Negative	Human metapneumovirus (associated with upper respiratory tract infection)	＜250	/	Negative	/	/	Negative	/
83	No-ICU	BALF	Fungi	Candida tropicalis	C.tropicalis	+	-	-	Not evaluated	Colonization	/	/	/	Pneumonia	2054	1×10^3	DNA＋RNA	-	-	Negative	Negative	Negative	Negative	Human metapneumovirus (associated with upper respiratory tract infection)	＜250	/	Negative	/	/	Negative	/
83	No-ICU	BALF	Fungi	Pneumocystis jirovecii	P.jirovecii	-	+	-	Unlikely	No	TN	FP	TN	Pneumonia	-	-	DNA＋RNA	1	0.185	Negative	Negative	Negative	Negative	Human metapneumovirus (associated with upper respiratory tract infection)	＜250	/	Negative	/	/	Negative	/
83	No-ICU	BALF	DNA virus	Epstein-Barr virus	EBV	-	+	-	Not evaluated	Non-pathogenic	/	/	/	Pneumonia	-	-	DNA＋RNA	191	0.094	Negative	Negative	Negative	Negative	Human metapneumovirus (associated with upper respiratory tract infection)	＜250	/	Negative	/	/	Negative	/
84	ICU	Sputum	Fungi	Candida albicans	C.albicans	+	+	-	Not evaluated	Colonization	/	/	/	Pneumonia	26350	1544480	DNA＋RNA	1060	0.711	Negative	Negative	Negative	Negative	/	＜250	Negative	Negative	/	/	/	/
84	ICU	Sputum	Fungi	Candida glabrata	C.glabrata	+	+	-	Not evaluated	Colonization	/	/	/	Pneumonia	2615	1532	DNA＋RNA	298	0.216	Negative	Negative	Negative	Negative	/	＜250	Negative	Negative	/	/	/	/
84	ICU	Sputum	DNA virus	Herpes simplex virus 1	HSV-1	+	-	-	Not evaluated	Non-pathogenic	/	/	/	Pneumonia	23547	1380160	DNA＋RNA	-	-	Negative	Negative	Negative	Negative	/	＜250	Negative	Negative	/	/	/	/
84	ICU	Sputum	DNA virus	Epstein-Barr virus	EBV	+	-	-	Not evaluated	Non-pathogenic	/	/	/	Pneumonia	9657	56608	DNA＋RNA	-	-	Negative	Negative	Negative	Negative	/	＜250	Negative	Negative	/	/	/	/
84	ICU	Sputum	Any other type	/	/	-	-	-	Negative	Negative	FN	FN	FN	Pneumonia	-	-	DNA＋RNA	-	-	Negative	Negative	Negative	Negative	/	＜250	Negative	Negative	/	/	/	/
85	ICU	Sputum	Fungi	Candida albicans	C.albicans	+	+	-	Not evaluated	Colonization	/	/	/	Pneumonia	34262	2610448	DNA＋RNA	602	0.969	Negative	Negative	Negative	Positive	Negative	＜250	Negative	Negative	/	/	/	/
85	ICU	Sputum	RNA virus	Severe acute respiratory syndrome coronavirus 2	SARS-CoV-2	+	+	+	Definite	Yes	TP	TP	TP	Pneumonia	25	65	DNA＋RNA	8684	1	Negative	Negative	Negative	Positive	Negative	＜250	Negative	Negative	/	/	/	/
85	ICU	Sputum	DNA virus	Epstein-Barr virus	EBV	-	+	-	Not evaluated	Non-pathogenic	/	/	/	Pneumonia	-	-	DNA＋RNA	3	1	Negative	Negative	Negative	Positive	Negative	＜250	Negative	Negative	/	/	/	/
86	No-ICU	BALF	Bacteria	Pseudomonas aeruginosa	P.aeruginosa	+	+	+	Definite	Yes	TP	TP	TP	Pneumonia	136576	5463040	DNA＋RNA	896930	0.891	P.aeruginosa	Negative	Negative	/	Negative	/	Negative	Negative	/	/	Negative	/
87	ICU	Sputum	Bacteria	Pseudomonas aeruginosa	P.aeruginosa	+	+	+	Definite	Yes	TP	TP	TP	Pneumonia	81951	1311216	DNA＋RNA	3662473	0.422	P.aeruginosa, E.coli	/	C.glabratus	Negative	Negative	/	Negative	Negative	/	/	/	/
87	ICU	Sputum	Bacteria	Escherichia coli	E.coli	+	+	+	Definite	Yes	TP	TP	TP	Pneumonia	38316	6130560	DNA＋RNA	94606	0.016	P.aeruginosa, E.coli	/	C.glabratus	Negative	Negative	/	Negative	Negative	/	/	/	/
87	ICU	Sputum	Bacteria	Stenotrophomonas maltophilia	S.maltophilia	+	+	-	Definite	Yes	TP	TP	FN	Pneumonia	46113	7378080	DNA＋RNA	74315	0.011	P.aeruginosa, E.coli	/	C.glabratus	Negative	Negative	/	Negative	Negative	/	/	/	/
87	ICU	Sputum	Fungi	Candida glabrata	C.glabrata	+	+	+	Not evaluated	Colonization	/	/	/	Pneumonia	10876	17401	DNA＋RNA	11246	0.945	P.aeruginosa, E.coli	/	C.glabratus	Negative	Negative	/	Negative	Negative	/	/	/	/
87	ICU	Sputum	Fungi	Candida tropicalis	C.tropicalis	+	+	-	Not evaluated	Colonization	/	/	/	Pneumonia	245	392	DNA＋RNA	559	0.04	P.aeruginosa, E.coli	/	C.glabratus	Negative	Negative	/	Negative	Negative	/	/	/	/
87	ICU	Sputum	Fungi	Candida albicans	C.albicans	+	+	-	Not evaluated	Colonization	/	/	/	Pneumonia	262	419	DNA＋RNA	36	0.003	P.aeruginosa, E.coli	/	C.glabratus	Negative	Negative	/	Negative	Negative	/	/	/	/
88	ICU	BALF	RNA virus	Severe acute respiratory syndrome coronavirus 2	SARS-CoV-2	+	+	-	Definite	Yes	TP	TP	FN	Pneumonia	6861	9×10^4	DNA＋RNA	325	0.976	Negative	Negative	Negative	Negative	Negative	＜250	Negative	Negative	/	/	/	/
88	ICU	BALF	DNA virus	Human herpesvirus 7	HHV-7	+	-	-	Not evaluated	Non-pathogenic	/	/	/	Pneumonia	4682	6×10^4	DNA＋RNA	-	-	Negative	Negative	Negative	Negative	Negative	＜250	Negative	Negative	/	/	/	/
88	ICU	BALF	DNA virus	Cytomegalo virus	CMV	+	-	-	Not evaluated	Non-pathogenic	/	/	/	Pneumonia	5886	8×10^4	DNA＋RNA	-	-	Negative	Negative	Negative	Negative	Negative	＜250	Negative	Negative	/	/	/	/
92	ICU	BALF	Bacteria	Acinetobacter baumannii	A.baumannii	+	+	+	Definite	Yes	TP	TP	TP	Pneumonia	42544	5×10^6	DNA＋RNA	2462	0.509	A.baumannii, K.pneumoniae	Negative	Negative	Negative	Negative	＜250	Negative	Negative	/	/	/	/
92	ICU	BALF	Bacteria	Klebsiella pneumoniae	K.pneumoniae	+	-	+	Definite	Yes	TP	FN	TP	Pneumonia	6780	8×10^3	DNA＋RNA	-	-	A.baumannii, K.pneumoniae	Negative	Negative	Negative	Negative	＜250	Negative	Negative	/	/	/	/
92	ICU	BALF	Bacteria	Elizabethkingia meningoseptica	E.meningoseptica	-	+	-	Possible	No	/	/	/	Pneumonia	-	-	DNA＋RNA	1294	0.164	A.baumannii, K.pneumoniae	Negative	Negative	Negative	Negative	＜250	Negative	Negative	/	/	/	/
92	ICU	BALF	DNA virus	Herpes simplex virus 1	HSV-1	+	+	-	Not evaluated	Non-pathogenic	/	/	/	Pneumonia	523610	6×10^6	DNA＋RNA	6430	1	A.baumannii, K.pneumoniae	Negative	Negative	Negative	Negative	＜250	Negative	Negative	/	/	/	/
93	ICU	BALF	Bacteria	Acinetobacter baumannii	A.baumannii	+	+	+	Definite	Yes	TP	TP	TP	Pneumonia	269050	1×10^6	DNA＋RNA	280920	0.773	A.baumannii	/	Negative	Negative	Negative	＜250	Negative	Negative	/	/	/	/
93	ICU	BALF	Fungi	Candida albicans	C.albicans	-	+	-	Not evaluated	Colonization	/	/	/	Pneumonia	-	-	DNA＋RNA	218	0.952	A.baumannii	/	Negative	Negative	Negative	＜250	Negative	Negative	/	/	/	/
93	ICU	BALF	DNA virus	Herpes simplex virus 1	HSV-1	+	+	-	Not evaluated	Non-pathogenic	/	/	/	Pneumonia	767	4×10^2	DNA＋RNA	31	0.031	A.baumannii	/	Negative	Negative	Negative	＜250	Negative	Negative	/	/	/	/
94	No-ICU	BALF	Mycobacteria	Mycobacterium avium complex	MAC	+	+	-	Definite	Yes	TP	TP	FN	Pneumonia	42	1×10^2	DNA＋RNA	33	0.057	Negative	Negative	Negative	/	Negative	＜250	Negative	Negative	/	/	Negative	/
95	ICU	BALF	Bacteria	Klebsiella pneumoniae	K.pneumoniae	+	+	+	Definite	Yes	TP	TP	TP	Pneumonia	60864	6×10^6	DNA＋RNA	19674	0.27	K.pneumoniae	Negative	Negative	Positive	Negative	＜250	Negative	Negative	/	/	/	/
95	ICU	BALF	RNA virus	Severe acute respiratory syndrome coronavirus 2	SARS-CoV-2	-	+	+	Definite	Yes	FN	TP	TP	Pneumonia	-	-	DNA＋RNA	42833	93.0%%	K.pneumoniae	Negative	Negative	Positive	Negative	＜250	Negative	Negative	/	/	/	/
95	ICU	BALF	DNA virus	Herpes simplex virus 1	HSV-1	+	-	-	Not evaluated	Non-pathogenic	/	/	/	Pneumonia	173	2×10^2	DNA＋RNA	-	-	K.pneumoniae	Negative	Negative	Positive	Negative	＜250	Negative	Negative	/	/	/	/
96	ICU	BALF	Bacteria	Staphylococcus aureus	S.aureus	-	+	-	Possible	No	/	/	/	Pneumonia	-	-	DNA＋RNA	16	0.042	Negative	Negative	C.albicans	Positive	Negative	＜250	Negative	Negative	/	/	/	/
96	ICU	BALF	Fungi	Pneumocystis jirovecii	P.jirovecii	+	+	-	Definite	Yes	TP	TP	FN	Pneumonia	299	8×10^2	DNA＋RNA	71	0.329	Negative	Negative	C.albicans	Positive	Negative	＜250	Negative	Negative	/	/	/	/
96	ICU	BALF	Fungi	Candida albicans	C.albicans	+	+	+	Not evaluated	Colonization	/	/	/	Pneumonia	9246	2×10^4	DNA＋RNA	200	0.594	Negative	Negative	C.albicans	Positive	Negative	＜250	Negative	Negative	/	/	/	/
96	ICU	BALF	DNA virus	Epstein-Barr virus	EBV	+	+	-	Not evaluated	Non-pathogenic	/	/	/	Pneumonia	3444	9×10^4	DNA＋RNA	42	0.024	Negative	Negative	C.albicans	Positive	Negative	＜250	Negative	Negative	/	/	/	/
96	ICU	BALF	DNA virus	Cytomegalo virus	CMV	+	+	-	Not evaluated	Non-pathogenic	/	/	/	Pneumonia	120773	3×10^6	DNA＋RNA	1933	0.714	Negative	Negative	C.albicans	Positive	Negative	＜250	Negative	Negative	/	/	/	/
96	ICU	BALF	DNA virus	Human polyomavirus 7	HPyV-7	+	-	-	Not evaluated	Non-pathogenic	/	/	/	Pneumonia	57666	1×10^6	DNA＋RNA	-	-	Negative	Negative	C.albicans	Positive	Negative	＜250	Negative	Negative	/	/	/	/
97	ICU	BALF	Bacteria	Staphylococcus aureus	S.aureus	+	+	+	Definite	Yes	TP	TP	TP	Pneumonia	122916	3×10^6	DNA＋RNA	1880747	0.764	S.aureus	Negative	Negative	Negative	Negative	＜250	Negative	Negative	/	/	/	/
97	ICU	BALF	Bacteria	Pseudomonas aeruginosa	P.aeruginosa	+	+	-	Definite	Yes	TP	TP	FN	Pneumonia	282	6×10^2	DNA＋RNA	76739	0.011	S.aureus	Negative	Negative	Negative	Negative	＜250	Negative	Negative	/	/	/	/
97	ICU	BALF	Bacteria	Escherichia coli	E.coli	+	+	-	Definite	Yes	TP	TP	FN	Pneumonia	286	7×10^2	DNA＋RNA	805	0.001	S.aureus	Negative	Negative	Negative	Negative	＜250	Negative	Negative	/	/	/	/
97	ICU	BALF	Fungi	Candida albicans	C.albicans	+	+	-	Not evaluated	Colonization	/	/	/	Pneumonia	738	2×10^3	DNA＋RNA	-	-	S.aureus	Negative	Negative	Negative	Negative	＜250	Negative	Negative	/	/	/	/
97	ICU	BALF	Fungi	Pneumocystis jirovecii	P.jirovecii	+	+	-	Definite	Yes	TP	TP	FN	Pneumonia	8	2×10^1	DNA＋RNA	83	0.071	S.aureus	Negative	Negative	Negative	Negative	＜250	Negative	Negative	/	/	/	/
97	ICU	BALF	DNA virus	Human herpesvirus 8	HHV-7	-	+	-	Not evaluated	Non-pathogenic	/	/	/	Pneumonia	-	-	DNA＋RNA	26	0.001	S.aureus	Negative	Negative	Negative	Negative	＜250	Negative	Negative	/	/	/	/
97	ICU	BALF	DNA virus	Epstein-Barr virus	EBV	+	+	-	Not evaluated	Non-pathogenic	/	/	/	Pneumonia	349	8×10^2	DNA＋RNA	332	0.003	S.aureus	Negative	Negative	Negative	Negative	＜250	Negative	Negative	/	/	/	/
97	ICU	BALF	DNA virus	Cytomegalo virus	CMV	+	+	-	Not evaluated	Non-pathogenic	/	/	/	Pneumonia	1569	4×10^3	DNA＋RNA	137	0.001	S.aureus	Negative	Negative	Negative	Negative	＜250	Negative	Negative	/	/	/	/
98	ICU	BALF	RNA virus	Severe acute respiratory syndrome coronavirus 2	SARS-CoV-2	+	+	+	Definite	Yes	TP	TP	TP	Pneumonia	1790	4×10^3	DNA＋RNA	7668	0.563	Negative	Negative	Negative	Positive	Negative	＜250	Negative	Negative	/	/	/	/
98	ICU	BALF	DNA virus	Epstein-Barr virus	EBV	+	-	-	Not evaluated	Non-pathogenic	/	/	/	Pneumonia	367	8×10^2	DNA＋RNA	-	-	Negative	Negative	Negative	Positive	Negative	＜250	Negative	Negative	/	/	/	/
99	No-ICU	BALF	Bacteria	Enterococcus faecalis	E.faecalis	+	+	-	Definite	Yes	TP	TP	FN	Pneumonia	51630	2×10^6	DNA＋RNA	6605	0.386	K.pneumoniae	Negative	C.albicans	Negative	Negative	＜250	Negative	Negative	/	/	/	/
99	No-ICU	BALF	Bacteria	Klebsiella pneumoniae	K.pneumoniae	+	+	+	Definite	Yes	TP	TP	TP	Pneumonia	2000	7×10^4	DNA＋RNA	2284	0.259	K.pneumoniae	Negative	C.albicans	Negative	Negative	＜250	Negative	Negative	/	/	/	/
99	No-ICU	BALF	Fungi	Candida albicans	C.albicans	+	+	+	Definite	Yes	TP	TP	TP	Pneumonia	10414	4×10^6	DNA＋RNA	18651	0.896	K.pneumoniae	Negative	C.albicans	Negative	Negative	＜250	Negative	Negative	/	/	/	Repeated detection
99	No-ICU	BALF	DNA virus	Epstein-Barr virus	EBV	+	+	+	Definite	Yes	TP	TP	TP	Pneumonia	3787	1×10^4	DNA＋RNA	5122	0.689	K.pneumoniae	Negative	C.albicans	Negative	Negative	＜250	Negative	Negative	/	/	/	/
100	ICU	BALF	Bacteria	Klebsiella pneumoniae	K.pneumoniae	+	+	+	Definite	Yes	TP	TP	TP	Pneumonia	42298	3×10^6	DNA＋RNA	55136	0.398	K.pneumoniae	/	C.albicans	/	Negative	/	Negative	Negative	/	/	/	/
100	ICU	BALF	Fungi	Candida albicans	C.albicans	+	+	+	Definite	Yes	TP	TP	TP	Pneumonia	2822	2×10^4	DNA＋RNA	1578	0.908	K.pneumoniae	/	C.albicans	/	Negative	/	Negative	Negative	/	/	/	/
100	ICU	BALF	DNA virus	Herpes simplex virus 1	HSV-1	+	+	-	Not evaluated	Non-pathogenic	/	/	/	Pneumonia	2457	1×10^4	DNA＋RNA	482	0.514	K.pneumoniae	/	C.albicans	/	Negative	/	Negative	Negative	/	/	/	/
101	No-ICU	BALF	Fungi	Aspergillus niger	A.niger	-	+	-	Unlikely	No	TN	FP	TN	Pneumonia	-	-	DNA	3	0.238	Negative	MTBC	Negative	Negative	Negative	/	Negative	Negative	/	/	Positive	/
101	No-ICU	BALF	Mycobacteria	Mycobacterium tuberculosis complex	MTBC	+	+	+	Definite	Yes	TP	TP	TP	Pneumonia	31268	3×10^5	DNA	553	0.071	Negative	MTBC	Negative	Negative	Negative	/	Negative	Negative	/	/	Positive	/
101	No-ICU	BALF	DNA virus	Human herpesvirus 7	HHV-7	+	+	-	Not evaluated	Non-pathogenic	/	/	/	Pneumonia	1206	1×10^3	DNA	11	0.005	Negative	MTBC	Negative	Negative	Negative	/	Negative	Negative	/	/	Positive	/
101	No-ICU	BALF	DNA virus	Epstein-Barr virus	EBV	+	-	-	Not evaluated	Non-pathogenic	/	/	/	Pneumonia	241	2×10^2	DNA	-	-	Negative	MTBC	Negative	Negative	Negative	/	Negative	Negative	/	/	Positive	/
102	ICU	BALF	Bacteria	Escherichia coli	E.coli	+	+	+	Definite	Yes	TP	TP	TP	Pneumonia	14089	6×10^6	DNA＋RNA	14699	0.129	E.coli	/	Negative	Negative	Negative	＜250	Negative	Negative	/	/	/	/
102	ICU	BALF	Bacteria	Legionella pneumophila	L.pneumophila	+	+	-	Definite	Yes	TP	TP	FN	Pneumonia	143	6×10^2	DNA＋RNA	67	0.001	E.coli	/	Negative	Negative	Negative	＜250	Negative	Negative	/	/	/	/
102	ICU	BALF	Fungi	Pneumocystis jirovecii	P.jirovecii	-	+	-	Probable	Yes	FN	TP	FN	Pneumonia	-	-	DNA＋RNA	31	0.029	E.coli	/	Negative	Negative	Negative	＜250	Negative	Negative	/	/	/	/
102	ICU	BALF	Fungi	Aspergillus fumigatus	A.fumigatus	+	+	-	Definite	Yes	TP	TP	FN	Pneumonia	4	1×10^1	DNA＋RNA	4	0.001	E.coli	/	Negative	Negative	Negative	＜250	Negative	Negative	/	/	/	/
102	ICU	BALF	DNA virus	Herpes simplex virus 1	HSV-1	-	+	-	Not evaluated	Non-pathogenic	/	/	/	Pneumonia	-	-	DNA＋RNA	53	0.001	E.coli	/	Negative	Negative	Negative	＜250	Negative	Negative	/	/	/	/
102	ICU	BALF	DNA virus	Epstein-Barr virus	EBV	+	+	-	Not evaluated	Non-pathogenic	/	/	/	Pneumonia	54525	2×10^6	DNA＋RNA	76145	0.791	E.coli	/	Negative	Negative	Negative	＜250	Negative	Negative	/	/	/	/
102	ICU	BALF	DNA virus	Cytomegalo virus	CMV	+	+	-	Not evaluated	Non-pathogenic	/	/	/	Pneumonia	2323	9×10^4	DNA＋RNA	918	0.007	E.coli	/	Negative	Negative	Negative	＜250	Negative	Negative	/	/	/	/

## Sheet: Table S3
Table S3. AMR genes detected by tNGS and their assciated responsible paghogens
Patients' identity	AMR genes	Reads	Normalized reads(/mL)	Associated responsible pathogens	Associated resistance phenotype
2	AAC(6′)	102	464	P.aeruginosa	aminoglycoside antibiotic
2	GES	91	416	P.aeruginosa	carbapenem, cephalosporin, penam
3	tetM	62	160	S.aureus, A.baumannii	tetracycline antibiotic
3	OXA-23	58	160	A.baumannii	carbapenem, penam
3	AAC(6′)	28	80	S.maltophilia, S.aureus, P.aeruginosa, A.baumannii	aminoglycoside antibiotic
3	cmlA	10	32	P.aeruginosa, A.baumannii	phenicol antibiotic
7	OXA-23	733	3867	A.baumannii	carbapenem, penam
7	TEM	64	337	A.baumannii	cephalosporin, monobactam, penem, penam
7	tetW	3887	20510	-	tetracycline antibiotic
8	OXA-23	3844	32955	A.baumannii	carbapenem, penam
8	TEM	389	3329	A.baumannii	cephalosporin, monobactam, penem, penam
8	ADE	93	795	A.baumannii	rifamycin antibiotic, diaminopyrimidine antibiotic, tetracycline antibiotic, phenicol antibiotic, carbapenem, penem, fluoroquinolone antibiotic, lincosamide antibiotic, macrolide antibiotic, cephalosporin
8	OXA-51	36	30	A.baumannii	carbapenem, penam
8	OXA-69	32	27	A.baumannii	carbapenem, penam
8	ARM	7	56	A.baumannii	aminoglycoside antibiotic
8	mefA	85	726	-	macrolide antibiotic
10	ermB	116	192	-	macrolide antibiotic
10	tetM	81	144	-	tetracycline antibiotic
17	OXA-23	396	1816	A.baumannii	carbapenem, penam
20	KPC	360	7600	K.pneumoniae	carbapenem, cephalosporin, monobactam, penam
20	TEM	187	395	K.pneumoniae	cephalosporin, monobactam, penem, penam
24	tetW	69	160	-	tetracycline antibiotic
28	tetW	1123	1440	-	tetracycline antibiotic
28	TEM	75	160	-	cephalosporin, monobactam, penem, penam
30	OXA-23	1013	56208	A.baumannii	carbapenem, penam
30	TEM	89	489	A.baumannii	cephalosporin, monobactam, penem, penam
31	tetW	1984	80497	-	tetracycline antibiotic
31	tetQ	169	6873	-	tetracycline antibiotic
34	tetW	533	5148	-	tetracycline antibiotic
40	tetW	4818	12640	-	tetracycline antibiotic
41	tetL	40	48	-	tetracycline antibiotic
42	tetW	105	160	-	tetracycline antibiotic
47	OXA-23	7315	1032992	A.baumannii	carbapenem, penam
47	TEM	1463	20652	A.baumannii	cephalosporin, monobactam, penem, penam
47	ADE	288	4054	A.baumannii	rifamycin antibiotic, diaminopyrimidine antibiotic, tetracycline antibiotic, phenicol antibiotic, carbapenem, penem, fluoroquinolone antibiotic, lincosamide antibiotic, macrolide antibiotic, cephalosporin
47	OXA-51	92	128	A.baumannii	carbapenem, penam
47	OXA-69	92	129	A.baumannii	carbapenem, penam
47	ARM	32	44	A.baumannii	aminoglycoside antibiotic
47	mefA	276	3892	-	macrolide antibiotic
48	OXA-1	154	640	K.pneumoniae	cephalosporin, penam
48	KPC	133	560	K.pneumoniae	carbapenem, cephalosporin, monobactam, penam
48	CTX-M-1	72	304	K.pneumoniae	cephalosporin
48	AAC(6′)	47	20	K.pneumoniae	aminoglycoside antibiotic
49	OXA-23	190	608	A.baumannii	carbapenem, penam
51	KPC	53	413	P.aeruginosa	carbapenem, cephalosporin, monobactam, penam
55	tetW	4777	2302	-	tetracycline antibiotic
56	tetW	24171	27624	-	tetracycline antibiotic
67	AAC(3)	531	243	C.striatum	aminoglycoside antibiotic
67	AAC(6′)	10902	49696	C.striatum	aminoglycoside antibiotic
67	tetQ	1368	624	-	tetracycline antibiotic
68	tetW	1292	147	-	tetracycline antibiotic
69	ADE	1778	2370	A.baumannii	rifamycin antibiotic, diaminopyrimidine antibiotic, tetracycline antibiotic, phenicol antibiotic, carbapenem, penem, fluoroquinolone antibiotic, lincosamide antibiotic, macrolide antibiotic, cephalosporin
69	ARM	1039	1385	A.baumannii	aminoglycoside antibiotic
69	OXA-23	27932	3724272	A.baumannii	carbapenem, penam
69	OXA-51	1789	2385	A.baumannii	carbapenem, penam
69	OXA-69	1736	2314	A.baumannii	carbapenem, penam
69	TEM	7697	10262	A.baumannii	cephalosporin, monobactam, penem, penam
69	mefA	5313	70840	-	macrolide antibiotic
70	KPC	1187	9496	K.pneumoniae	carbapenem, cephalosporin, monobactam, penam
70	SHV	341	272	K.pneumoniae	carbapenem, cephalosporin, penam
70	TEM	781	624	K.pneumoniae	cephalosporin, monobactam, penem, penam
70	mecA	96	76	S.aureus	penam
77	tetW	6064	3056	E.faecalis	tetracycline antibiotic
80	ermB	859	148	-	macrolide antibiotic
80	tetM	430	752	-	tetracycline antibiotic
80	tetQ	19373	33488	-	tetracycline antibiotic
81	cmlA	256	819	E.coli	phenicol antibiotic
81	TolC	3341	1069	E.coli	peptide antibiotic, aminoglycoside antibiotic, tetracycline antibiotic, macrolide antibiotic, fluoroquinolone antibiotic, penam, carbapenem, penem, aminocoumarin antibiotic, phenicol antibiotic, cephalosporin, disinfecting agents and antiseptics, glycylcycline, rifamycin antibiotic, cephamycin
84	QAC	294	172	-	fluoroquinolone antibiotic
84	mecA	76	44	-	penam
85	ermB	1892	1441	-	macrolide antibiotic
85	tetM	8389	63916	-	tetracycline antibiotic
85	tetQ	440251	3354294	-	tetracycline antibiotic
85	tetW	3800	2895	-	tetracycline antibiotic
87	AAC(6′)	1226	1961	P.aeruginosa, E.coli	aminoglycoside antibiotic
87	cmlA	736	117	P.aeruginosa, E.coli	phenicol antibiotic
87	tetQ	921	1473	-	tetracycline antibiotic
87	tetW	2404	3846	-	tetracycline antibiotic
93	ADE	491	261	A.baumannii	rifamycin antibiotic, diaminopyrimidine antibiotic, tetracycline antibiotic, phenicol antibiotic, carbapenem, penem, fluoroquinolone antibiotic, lincosamide antibiotic, macrolide antibiotic, cephalosporin
93	OXA-23	8107	43237	A.baumannii	carbapenem, penam
93	TEM	3852	2054	A.baumannii	cephalosporin, monobactam, penem, penam
93	mefA	401	213	-	macrolide antibiotic
94	tetM	756	150	-	tetracycline antibiotic
94	tetO	707	140	-	tetracycline antibiotic
94	tetW	42734	84208	-	tetracycline antibiotic
95	AAC(3)	13	13	K.pneumoniae	aminoglycoside antibiotic
95	AAC(6′)	369	369	K.pneumoniae	aminoglycoside antibiotic
95	CTX-M-1	15	15	K.pneumoniae	cephalosporin
95	KPC	2893	28931	K.pneumoniae	carbapenem, cephalosporin, monobactam, penam
95	SHV	478	4780	K.pneumoniae	carbapenem, cephalosporin, penam
95	TEM	766	7660	K.pneumoniae	cephalosporin, monobactam, penem, penam
95	tetW	2455	24550	-	tetracycline antibiotic
97	APH(3′)	1053	2406	S.aureus	aminoglycoside antibiotic
97	CTX-M-1	13	29	P.aeruginosa, E.coli	cephalosporin
97	mecA	515	1177	S.aureus	penam
97	tetK	4211	96252	S.aureus	tetracycline antibiotic
97	tetM	1740	3977	S.aureus	tetracycline antibiotic
97	mefA	527	1204	-	macrolide antibiotic
97	tetW	6150	14057	-	tetracycline antibiotic
98	tetW	11534	24606	-	tetracycline antibiotic
99	KPC	81	283	K.pneumoniae	carbapenem, cephalosporin, monobactam, penam
99	QAC	191	673	E.faecalis	fluoroquinolone antibiotic
99	ermB	172	604	E.faecalis, K.pneumoniae	macrolide antibiotic
99	tetK	691	2440	E.faecalis	tetracycline antibiotic
99	tetL	486	1715	E.faecalis	tetracycline antibiotic
99	mecA	43	15	-	penam
100	AAC(6′)	157	952	K.pneumoniae	aminoglycoside antibiotic
100	CTX-M-1	200	1210	K.pneumoniae	cephalosporin
100	KPC	6636	4035056	K.pneumoniae	carbapenem, cephalosporin, monobactam, penam
100	OXA-1	180	109	K.pneumoniae	cephalosporin, penam
100	SHV	3095	18816	K.pneumoniae	carbapenem, cephalosporin, penam
100	TEM	3823	23242	K.pneumoniae	cephalosporin, monobactam, penem, penam
100	qnrA	970	5893	K.pneumoniae	fluoroquinolone antibiotic
100	mefA	341	2069	-	macrolide antibiotic
101	ermB	179	176	-	macrolide antibiotic
101	tetM	227	208	-	tetracycline antibiotic
101	tetQ	513	4640	-	tetracycline antibiotic
101	tetW	225	208	-	tetracycline antibiotic
102	ACR	176	691	E.coli	tetracycline antibiotic, glycylcycline, cephalosporin, phenicol antibiotic, penam, rifamycin antibiotic, disinfecting agents and antiseptics, fluoroquinolone antibiotic
102	AmpC	68	264	E.coli	cephalosporin, penam
102	CTX-M-1	361	1424	E.coli	cephalosporin
102	EMR	153	600	E.coli	fluoroquinolone antibiotic
102	TEM	182	717	E.coli	cephalosporin, monobactam, penem, penam
102	tetM	110	430	E.coli	tetracycline antibiotic
102	TolC	198	779	E.coli	peptide antibiotic, aminoglycoside antibiotic, tetracycline antibiotic, macrolide antibiotic, fluoroquinolone antibiotic, penam, carbapenem, penem, aminocoumarin antibiotic, phenicol antibiotic, cephalosporin, disinfecting agents and antiseptics, glycylcycline, rifamycin antibiotic, cephamycin

## Sheet: Table S4
Table S4. Virulence genes detected by tNGS and their assciated responsible paghogens
Patients' identity	Virulence genes	Reads	Normalized reads(/mL)	Associated responsible pathogens
1	exoY	152	256	P.aeruginosa
2	exoY	55	256	P.aeruginosa
3	lpxD	118	304	A.baumannii
7	lpxD	566	2984	A.baumannii
7	pgaC	233	1230	A.baumannii
7	csuE	174	916	A.baumannii
7	adeG	149	785	A.baumannii
7	pgaD	103	539	A.baumannii
7	csuD	92	484	A.baumannii
7	lpxM	91	476	A.baumannii
7	lpsB	90	473	A.baumannii
7	adeF	70	366	A.baumannii
7	lpxL	65	339	A.baumannii
8	lpxD	3054	26185	A.baumannii
8	pgaC	1206	10339	A.baumannii
8	csuE	906	7766	A.baumannii
8	adeG	891	7638	A.baumannii
8	lpxM	550	4715	A.baumannii
8	lpsB	503	4308	A.baumannii
8	pgaD	464	3976	A.baumannii
8	csuD	450	3852	A.baumannii
8	adeF	393	3366	A.baumannii
8	lpxL	353	3022	A.baumannii
8	pgaB	13	11	A.baumannii
17	lpxD	392	1798	A.baumannii
17	pgaC	150	689	A.baumannii
17	csuE	126	576	A.baumannii
17	adeG	115	524	A.baumannii
17	lpsB	64	291	A.baumannii
17	pgaD	64	291	A.baumannii
17	lpxM	60	275	A.baumannii
17	adeF	53	241	A.baumannii
20	ybtE	767	1620	K.pneumoniae
20	ybtS	176	371	K.pneumoniae
20	ybtT	165	347	K.pneumoniae
20	ybtQ	161	339	K.pneumoniae
20	ybtP	125	264	K.pneumoniae
20	ybtA	100	211	K.pneumoniae
30	lpxD	776	4304	A.baumannii
30	pgaC	308	1707	A.baumannii
30	adeG	208	1152	A.baumannii
30	csuE	186	102	A.baumannii
30	lpxM	115	638	A.baumannii
30	lpsB	106	587	A.baumannii
30	adeF	95	523	A.baumannii
30	pgaD	94	516	A.baumannii
30	csuD	78	432	A.baumannii
30	lpxL	69	382	A.baumannii
48	ybtE	405	1680	K.pneumoniae
48	ybtT	97	416	K.pneumoniae
48	ybtQ	87	368	K.pneumoniae
48	ybtP	76	320	K.pneumoniae
48	ybtA	63	272	K.pneumoniae
47	lpxD	6994	9877920	A.baumannii
47	adeG	3585	50627	A.baumannii
47	pgaC	2874	40585	A.baumannii
47	lpxM	1910	26974	A.baumannii
47	csuE	1873	26449	A.baumannii
47	adeF	1779	25120	A.baumannii
47	lpsB	1560	22027	A.baumannii
47	lpxL	1479	20884	A.baumannii
47	csuD	1435	20265	A.baumannii
47	pgaD	1413	19947	A.baumannii
47	pgaB	53	737	A.baumannii
51	exoY	66	512	P.aeruginosa
49	lpxD	143	464	A.baumannii
70	iroN	73	58	K.pneumoniae
70	ybtA	446	356	K.pneumoniae
70	ybtE	2382	1905	K.pneumoniae
70	ybtP	202	16	K.pneumoniae
70	ybtQ	704	563	K.pneumoniae
70	ybtS	1166	9328	K.pneumoniae
70	ybtT	469	375	K.pneumoniae
70	ybtU	87	69	K.pneumoniae
69	adeF	25325	3376672	A.baumannii
69	adeG	33664	4488544	A.baumannii
69	csuD	14792	19722	A.baumannii
69	csuE	11671	15561	A.baumannii
69	lpsB	19187	2558272	A.baumannii
69	lpxD	31860	4248000	A.baumannii
69	lpxL	19669	2622544	A.baumannii
69	lpxM	19610	2614672	A.baumannii
69	pgaB	3063	4084	A.baumannii
69	pgaC	17139	22852	A.baumannii
69	pgaD	9550	12733	A.baumannii
87	chuU	540	864	E.coli
87	exoY	793	1268	P.aeruginosa
93	adeF	2215	1181	A.baumannii
93	adeG	4025	2146	A.baumannii
93	csuD	1735	9253	A.baumannii
93	csuE	2867	1529	A.baumannii
93	lpsB	2442	1302	A.baumannii
93	lpxD	13687	72997	A.baumannii
93	lpxL	1327	7077	A.baumannii
93	lpxM	2433	1297	A.baumannii
93	pgaC	4892	2609	A.baumannii
93	pgaD	1858	9909	A.baumannii
95	iroN	126	126	K.pneumoniae
95	ybtA	378	378	K.pneumoniae
95	ybtE	4287	42870	K.pneumoniae
95	ybtP	1174	1174	K.pneumoniae
95	ybtQ	1674	1674	K.pneumoniae
95	ybtS	767	7670	K.pneumoniae
95	ybtT	842	8420	K.pneumoniae
95	ybtU	312	312	K.pneumoniae
99	ybtE	70	246	K.pneumoniae
100	iroN	1279	77731	K.pneumoniae
100	ybtA	3757	22842	K.pneumoniae
100	ybtE	5285	3213536	K.pneumoniae
100	ybtP	2419	14708	K.pneumoniae
100	ybtQ	3175	19303	K.pneumoniae
100	ybtS	1634	99331	K.pneumoniae
100	ybtT	792	4814	K.pneumoniae
100	ybtU	1958	11902	K.pneumoniae
102	aslA	24	94	E.coli
102	chuS	94	369	E.coli
102	chuT	269	1059	E.coli
102	chuU	694	2737	E.coli
102	chuW	395	1555	E.coli
102	chuY	72	283	E.coli
102	ibeB	43	16	E.coli
102	ibeC	24	94	E.coli
102	kpsD	168	661	E.coli
102	senB	238	9353	E.coli
102	traJ	19	71	E.coli
